Title: **Immunoglobulin enhancers increase RNA polymerase 2 stalling at somatic hypermutation target sequences**

Running title: DIVACs induce Pol2 stalling

Alina Tarsalainen<sup>1\*</sup>, Yaakov Maman<sup>2\*</sup>, Fei-Long Meng<sup>3,4</sup>, Minna K. Kyläniemi<sup>1,5</sup>, Anni Soikkeli<sup>1</sup>, Paulina Budzynska<sup>1</sup>, Jessica J. McDonald<sup>6,7</sup>, Filip Šenigl<sup>8</sup>, Frederic W. Alt<sup>3</sup>, David G. Schatz<sup>6#</sup>, and Jukka Alinikula<sup>1#</sup>

1 Unit of Infections and Immunity, Institute of Biomedicine, University of Turku, Kiinamyllynkatu 10, 20520 Turku, Finland

2 The Azrieli Faculty of Medicine, Bar Ilan University, Henrietta Szold 8, Safed, 1311502, Israel

3 Department of Genetics, Harvard Medical School and Program in Cellular and Molecular Medicine, HHMI, Boston Children's Hospital, Boston, USA.

4. Current address: State Key Laboratory of Molecular Biology, CAS Center for Excellence in Molecular Cell Science, Shanghai Institute of Biochemistry and Cell Biology, Chinese Academy of Sciences, University of Chinese Academy of Sciences, Shanghai 200031, China

5 Current address: Turku Bioscience Centre, University of Turku and Åbo Akademi University, 20520 Turku, Finland.

6 Department of Immunobiology, Yale School of Medicine, New Haven, CT 06511, USA

7 Current address: The Annenberg Public Policy Center, 202 S. 36th St., Philadelphia, PA 19104-3806, USA

8 Institute of Molecular Genetics, Academy of Sciences of the Czech Republic, Videnska 1083, 142 20 Praha 4, Czech Republic

\* These authors contributed equally.

# Correspondence should be addressed to [jukka.alinikula@utu.fi](mailto:jukka.alinikula@utu.fi) and [david.schatz@yale.edu](mailto:david.schatz@yale.edu)

1 ABSTRACT

2

3 Somatic hypermutation (SHM) drives the genetic diversity of immunoglobulin (Ig) genes in  
4 activated B cells and supports the generation of antibodies with increased affinity for antigen.  
5 SHM is targeted to Ig genes by their enhancers (DIVACs; diversification activators), but how  
6 the enhancers mediate this activity is unknown. We show using chicken DT40 B cells that  
7 highly active DIVACs increase the phosphorylation of RNA polymerase 2 (Pol2) and Pol2  
8 occupancy in the mutating gene with little or no accompanying increase in elongation-  
9 competent Pol2 or production of full-length transcripts, indicating accumulation of stalled  
10 Pol2. DIVAC has similar effect also in human Ramos Burkitt lymphoma cells. The DIVAC-  
11 induced stalling is weakly associated with an increase in the detection of single-stranded  
12 DNA bubbles in the mutating target gene. We did not find evidence for antisense  
13 transcription, or that DIVAC functions by altering levels of H3K27ac or the histone variant  
14 H3.3 in the mutating gene. These findings argue for a connection between Pol2 stalling and  
15 *cis*-acting targeting elements in the context of SHM and thus define a mechanistic basis for  
16 locus-specific targeting of SHM in the genome. Our results suggest that DIVAC elements  
17 render the target gene a suitable platform for AID-mediated mutation without a requirement  
18 for increasing transcriptional output.

## 19 INTRODUCTION

20

21 Cells work to minimize somatic mutations to avoid genome instability and potential  
22 tumorigenesis. Immunoglobulin (Ig) genes are subjected to mutational processes to meet the  
23 needs of efficient antigen recognition and appropriate responses of the immune system to  
24 pathogenic invaders. Ig gene conversion (GCV) significantly contributes to the primary  
25 antibody repertoire of some species, class-switch recombination (CSR) alters antibody  
26 effector class, and somatic hypermutation (SHM) provides the variability needed for antigen  
27 affinity-based selection of B-cell clones during affinity maturation. These three processes are  
28 initiated by the mutator enzyme activation-induced cytidine deaminase (AID) acting on *IgH*  
29 switch regions (CSR) or *IgH* and *IgL* V region exons (GCV and SHM) (Arakawa et al., 2002;  
30 Muramatsu et al., 1999, 2000; Revy et al., 2000). AID catalyzes the deamination of cytosine  
31 in a single-stranded DNA (ssDNA) template, yielding a DNA-resident uracil. Subsequent  
32 processing of this lesion follows distinct pathways involving an overlapping set of DNA repair  
33 enzymes in CSR, GCV, and SHM (Methot and Di Noia, 2016). In the context of SHM, these  
34 lesions are either replicated over or recognized by error-prone mismatch and base-excision  
35 repair pathways, eventually resulting in single-nucleotide transition and transversion  
36 mutations as well as small insertions and deletions (Methot and Di Noia, 2016).

37

38 As AID-induced DNA lesions outside of Ig loci can be detrimental to genomic integrity and  
39 can lead to tumorigenesis (Casellas et al., 2016; Robbiani and Nussenzweig, 2013), the  
40 activity of AID needs to be tightly regulated. Indeed, the function of AID is regulated at the  
41 levels of gene expression, enzymatic activity, nuclear localization, and protein stability  
42 among others (Casellas et al., 2016; Xu et al., 2012). AID nuclear localization and target  
43 gene transcription alone do not explain the observed mutation window of approx. 150 to  
44 1,500 bp downstream of the Ig transcription start site (TSS) or the preference of SHM for Ig  
45 loci, whose mutation frequency is typically orders of magnitudes higher than other  
46 transcribed genes in germinal-center (GC) B cells (Casellas et al., 2016; Liu and Schatz,

47 2009; Liu et al., 2008; Martin et al., 2018). AID can be detected at many regions throughout  
48 the genome, even in loci that are not known to undergo somatic hypermutation (Yamane et  
49 al., 2011), and recruitment of AID to an IgV region is not sufficient to induce SHM in cells that  
50 undergo AID-induced deamination (Matthews et al., 2014). The mechanisms that target AID  
51 activity in the genome and, in particular, the mechanisms responsible for the dramatic  
52 elevation of AID action at IgV regions relative to other genes remain poorly understood.

53

54 AID binds to and travels with RNA polymerase 2 (Pol2), and the source of the ssDNA  
55 template for AID is believed to be Pol2-mediated transcription, a strict requirement for SHM  
56 (Chaudhuri et al., 2003; Keim et al., 2013; Pham et al., 2019; Yeap and Meng, 2019). Shortly  
57 after transcription initiation, DRB sensitivity-inducing factor (DSIF) is recruited to Pol2  
58 together with negative elongation factor (NELF), causing it to pause 25–60 bp downstream of  
59 the TSS (Core and Adelman, 2019). This poised Pol2 is phosphorylated at serine 5 of the  
60 heptad repeats of the C-terminal domain of the RPB1 subunit (S5P-CTD) by the Cdk7  
61 subunit of the initiation factor TFIIF (Core and Adelman, 2019). Upon pause release, the  
62 Cdk9 component of the positive transcription elongation factor P-TEFb phosphorylates serine  
63 2 of the RPB1 CTD (S2P-CTD), NELF, and the Spt5 subunit of the DSIF complex, leading to  
64 the dissociation of NELF and allowing the formation of the Pol2 elongation complex (Core  
65 and Adelman, 2019). S2P-CTD increases gradually during Pol2 progression through a gene,  
66 together with concomitant loss of S5P-CTD (Buratowski, 2009). AID can bind Spt5, and  
67 colocalizes with Spt5 and paused Pol2 at S regions (Pavri et al., 2010) as well as at IgV  
68 regions in GC B cells (Maul et al., 2014), and associates with components of the Pol2  
69 elongation complex (Methot et al., 2018; Pavri et al., 2010; Willmann et al., 2012).

70

71 AID off-target activity leading to chromosomal translocations is associated with antisense  
72 transcription and super-enhancers, regions of the genome characterized by a broad and  
73 strong pattern of acetylation of histone H3 at lysine 27 (H3K27ac) (Hnisz et al., 2013; Meng  
74 et al., 2014; Pefanis et al., 2014; Qian et al., 2014; Whyte et al., 2013). Off-target genes

75 frequently have gene-overlapping inter-connected super-enhancers serving as a source of  
76 convergent transcription, which could cause opposing Pol2 collision, stalling of Pol2, and  
77 perhaps stabilization of ssDNA on which AID could act (Meng et al., 2014; Qian et al., 2014).  
78 AID off-target activity has also been associated with promoter-upstream divergent  
79 transcription (Pefanis et al., 2014). These antisense RNA species are degraded by the RNA  
80 exosome complex, which may play a direct role in recruitment of AID activity to ssDNA (Basu  
81 et al., 2011; Pefanis et al., 2014). Whether antisense transcription and high levels of  
82 H3K27ac are required for SHM of IgV regions is not known.

83

84 Previous work has provided evidence that targeting of SHM to Ig loci is mediated by *cis*-  
85 acting DNA elements that coincide with Ig enhancers and enhancer-like sequences with  
86 clusters of TF binding sites (Blagodatski et al., 2009; Buerstedde et al., 2014; Kohler et al.,  
87 2012; Kothapalli et al., 2008, 2011; McDonald et al., 2013). These mutation enhancers are  
88 collectively called diversification activators (DIVACs) and were identified largely by using  
89 SHM reporters. The reporters utilize a GFP expression cassette driven by a strong viral  
90 promoter that is largely insensitive to transcriptional enhancement and are integrated into the  
91 pseudo V- and Ig $\lambda$ -deleted rearranged *IgL* locus in chicken DT40 B-cell line (Blagodatski et  
92 al., 2009; Buerstedde et al., 2014; Kohler et al., 2012; McDonald et al., 2013). When an  
93 active SHM recruiting sequence is placed adjacent to the reporter, the GFP gene  
94 accumulates AID-induced single-nucleotide substitution mutations, resulting in loss of GFP  
95 fluorescence (Blagodatski et al., 2009). DIVACs can increase GFP loss by more than 100-  
96 fold without a major effect on transcriptional output (Blagodatski et al., 2009; Kohler et al.,  
97 2012). DIVACs rely on NF- $\kappa$ B, IRF/Ets, and MEF2B consensus binding motifs as well as E  
98 boxes for full SHM recruiting activity (Buerstedde et al., 2014) and bind E-box binding  
99 factors, Ikaros, Ets, and Mef2 family factors in vitro (Dinesh et al., 2020). The endogenous  
100 element most clearly associated with the targeting of AID-mediated processes is the 3'RR, a  
101 super-enhancer/locus control region, which is critical for efficient CSR and IgH SHM (Cogné  
102 et al., 1994; Rouaud et al., 2013; Saintamand et al., 2016; Vincent-Fabert et al., 2010).

103

104 Previous genome mapping experiments revealed that SHM-susceptibility is a property of  
105 certain topologically associating domains (TADs) of chromatin and appears to be confined by  
106 TAD boundaries (Senigl et al 2019). Strikingly, when a DIVAC element was inserted into  
107 transcriptionally active TADs that do not support SHM, the TADs became SHM susceptible  
108 (Senigl et al., 2019). The findings led to a model in which the SHM-susceptibility of non-Ig  
109 portions of the genome is driven by non-Ig DIVAC-like elements acting throughout a TAD,  
110 perhaps assisted by the chromatin loop-extrusion machinery (Senigl et al., 2019). Similarly,  
111 *IgH* locus CSR is driven by chromatin loop extrusion that brings switch regions and the 3' RR  
112 into close proximity (Zhang et al., 2019). These parallels together with the evidence  
113 suggesting that Ig and non-Ig super-enhancers can confer susceptibility to AID suggest that  
114 the mechanisms that target SHM to Ig loci and to off-target sites in the genome might be  
115 closely related. However, the mechanism by which DIVACs stimulate SHM is not known.

116

117 To understand how Ig enhancers target SHM, we investigated the effect of DIVACs on  
118 constitutively highly transcribed transcription units. We characterized epigenetic marks, a  
119 histone isoform previously associated with SHM, antisense transcription, the abundance and  
120 phosphorylation status of Pol2, occupancy by Spt5, and single-strandedness at the DIVAC-  
121 regulated transcription unit. We observed that DIVAC did not alter many of the parameters  
122 that we examined, and that high levels of SHM could occur in the apparent absence of  
123 antisense transcription within the mutation target gene. However, we found DIVAC-  
124 dependent increases in S2P-CTD and S5P-CTD that co-occur with an increased presence of  
125 Spt5 at the transcription unit independently of increased transcript production. In addition,  
126 DIVAC can, under certain conditions, increase the single-stranded nature of the mutating  
127 target gene, with the increase likely reflecting effects on gene expression as well as mutation  
128 load of the target. We conclude that DIVAC modulates RNA polymerase elongation in a way  
129 that facilitates AID action on the DNA without necessitating changes in transcriptional output.

130 MATERIALS AND METHODS

131

132 *GFP reporter constructs*

133 The SD1 DIVAC is a composite DIVAC that consists of human Ig lambda enhancer, chicken  
134 light chain enhancer core through 3' core and human heavy chain intronic enhancer  
135 (Buerstedde et al., 2014) (fragments a, b and c in Figure 3A, respectively) and cloned  
136 between the *SpeI* and *NheI* sites immediately upstream of the pIgL<sup>(-)</sup> GFP2 plasmid  
137 (Blagodatski et al., 2009) to create the *SD1 GFP2* reporter. The *W GFP2* was previously  
138 described (Blagodatski et al., 2009). *GFP2* reporters with subregions of W DIVAC, the 1-3, 2-  
139 3, 1928 and its E box mutant 1928m upstream were described previously (Kohler et al.,  
140 2012; McDonald et al., 2013) To make the *Ri GFP2* reporter, an intronic region from mouse  
141 *Rag1* gene (mm10, chr2:101,646,501–101,647,818) was cloned between the *BamHI* and  
142 *SpeI* sites immediately upstream of the RSV promoter of the *GFP2* reporter. The DIVAC 2-3  
143 was cloned downstream of the polyA signal of the *Ri GFP2* between the *NheI* and *BamHI*  
144 sites to create the *Ri GFP2* 2-3 reporter. The lentiviral *GFP7* and *SD1 GFP7* reporters were  
145 described previously but without the T2A sequence (Senigl et al., 2019). To create the *SD2*  
146 *GFP7* reporter, the mouse Igλ 3-1 shadow enhancer (fragment “d” in Figure 3A) (Buerstedde  
147 et al., 2014) immediately 5' to the *SD1 GFP7*.

148

149 *GFP loss assay*

150 The GFP loss assay with the GFP2 reporter was done as previously described (Buerstedde  
151 et al., 2014). The reporter constructs were transfected to ΔφV IgL<sup>(-)</sup> AID<sup>R1</sup> DT40 cells  
152 (Blagodatski et al., 2009) and cells with targeted integration to IgL<sup>(-)</sup> locus selected based on  
153 loss of puromycin resistance. A clone with targeted integration was subcloned and cultured  
154 for 14 days, after which the percentage of GFP-negative cells in each subclone (minimum of  
155 12) were analyzed with flow cytometry. The GFP loss assay of the *GFP7* reporter was done  
156 as described (Senigl et al., 2019). The Ramos cells were transduced with lentivirus at low  
157 multiplicity of infection to achieve cells with single integrations. The GFP-positive cells were

158 sorted to isolate single-cell clones. Blasticidin was added after 17 days in culture and  
159 minimum of 16 clones were analyzed 21 days after sorting. The GFP-negative percentage of  
160 cells in each subclone were analyzed with a flow cytometer. In Figure 1D, each data point  
161 represents a median of subclones of an individual experiment as in Figure 1B. A subset of  
162 data in Figure 1 B were shown earlier (Kohler et al., 2012; McDonald et al., 2013).

163

#### 164 *Expression of GFP*

165 The expression was measured with both GFP fluorescence was analyzed by flow cytometer  
166 (NovoCyte, ACEA) and with RT-qPCR. The RT-qPCR RNA was isolated from three cultures  
167 using RNeasy Mini kit (Qiagen), the cDNA was synthesized using SensiFAST reverse  
168 transcriptase (Bioline), and quantitative PCR was run using SensiFAST Sybr Master Mix  
169 (Bioline). The primers used to detect GFP were a1 5'-caagggcgaggagctgttca-3' and 5'-  
170 tgaactgtggccgtacgtcg-3' (*GFP7*); a2 5'-cccgaccacatgaagcagca-3' and 5'-  
171 cgctggtggacgtagccttc-3' (*GFP2* and *GFP7*) and 18S ribosomal RNA were 5'-  
172 taaaggaattgacggaaggg-3' and 5'-tgtcaatcctgtccgtgtc-3'. The signal from GFP was divided by  
173 the signal from 18S to normalize.

174

#### 175 *Analysis for ssDNA and AID-induced mutations*

176 The sodium bisulfite treatment was performed as described previously (Ronai et al., 2007)  
177 with minor modifications.  $10^7$  cells were treated with 1.375 M sodium metabisulfite or 2.5 M  
178 sodium bisulfite. The DNA was amplified with OneTaq polymerase (New England Biolabs) or  
179 with Phusion U polymerase (Thermo Fisher Scientific), cloned with Zero Blunt TOPO PCR  
180 Cloning Kit (Invitrogen), and sequenced using Sanger sequencing.

181

182 Regions with at least two consecutive converted Cs on the same strand were considered  
183 ssDNA patches. SsDNA character was determined by two parameters: the frequency of  
184 single-stranded deoxycytidines (ssDNA frequency; number of Cs in patches divided by total  
185 number of sequenced Cs) and ssDNA patch size. Patch size is the mean of the minimum



186 and maximum possible sizes of the ssDNA patch. The minimum size is the number of  
187 nucleotides from the first to the last converted C, and the maximum size is the number of  
188 nucleotides between the first and the last non-converted C. For comparison of constructs,  
189 these parameters were assessed within the *GFP* open reading frame (TSS +15 to +714)  
190 since it is in this region where mutations can cause GFP loss (Figure 6A-C). For *keratin 5*, 6  
191 sequences of 675 bp were analyzed. The region from TSS +15 to +1,864 (GFP-ires-Bsr) was  
192 analyzed for the location of ssDNA patches and the location of AID-induced mutations  
193 (Figure 6 E-G).

194

195 The GC content was calculated with GC content calculator using the formula  $\text{Count}(G +$   
196  $C)/\text{Count}(A + T + G + C) \times 100\%$  and plotted with a 30-bp window (Biologics International  
197 corp. <https://www.biologicscorp.com/tools/GCContent>).

198

#### 199 *ChIP-seq*

200 The ChIPs were done essentially as previously described (Williams et al., 2016), with the  
201 following modifications.  $4 \times 10^7$  formaldehyde-fixed cells were lysed in SDS lysis buffer (50  
202 mM Tris-HCl, pH 8.0, 10 mM EDTA, 1% SDS, supplemented with Complete, EDTA-free  
203 Protease Inhibitor Cocktail (Roche)) and diluted 4-fold with dilution buffer (16.4 mM Tris-HCl,  
204 pH 8.0, 167 mM NaCl, 1.2 mM EDTA, 0.01% SDS, 1.1% Triton X-100, supplemented with  
205 inhibitors). The lysate was sonicated in aliquots using a water bath sonicator (Diagenode  
206 Bioruptor Pico) for 11 cycles (30 s on/30 s off) and cleared by centrifugation. The combined  
207 sonicated material was further diluted 1.5-fold with dilution buffer, and  $1.7 \times 10^7$  cell  
208 equivalents were subjected to immunoprecipitation with 5  $\mu\text{g}$  ( $\alpha$ -H3K27Ac,  $\alpha$ -H3.3,  $\alpha$ -RPB1,  
209  $\alpha$ -S5P CTD, and  $\alpha$ -S2P CTD), 7  $\mu\text{g}$  ( $\alpha$ -Spt5), or a 1:50 dilution ( $\alpha$ -H3K36me3) of antibodies  
210 overnight. The next day, immune complexes were incubated with magnetic beads for 2 h  
211 (Protein G Dynabeads, Thermo Fisher Scientific or Protein A/G magnetic beads, Pierce). The  
212 beads were collected using a magnetic rack and washed twice with low-salt wash buffer (20  
213 mM Tris-HCl, pH 8.0, 150 mM NaCl, 2 mM EDTA, 1% Triton X-100, 0.1% SDS,

214 supplemented with inhibitors), twice with ChIP wash buffer (50 mM HEPES, pH 7.6, 500 mM  
215 LiCl, 1 mM EDTA, 0.7% sodium deoxycholate, and 1% Igepal CA-630), and twice with TE  
216 buffer with 50 mM NaCl. Chromatin was eluted in 100  $\mu$ l of SDS lysis buffer with incubation  
217 at 1200 rpm on a thermal mixer for 15 min at 65 °C. The mixture was supplemented with 1  
218 volume of TE and Proteinase K and incubated at 65 °C overnight. The DNA was purified  
219 using phenol-chloroform extraction. The following antibodies were used for ChIP:  $\alpha$ -H3K27Ac  
220 (ab4729),  $\alpha$ -S5P CTD (ab5131), and  $\alpha$ -S2P CTD (ab5095) from Abcam;  $\alpha$ -H3K36me3  
221 (D5A7, #4909) from Cell Signaling Technology;  $\alpha$ -H3.3 (09-838) from Millipore;  $\alpha$ -RPB1  
222 (N20x) and  $\alpha$ -Spt5 (H-300x) from Santa Cruz Biotechnology.

223

224 ChIP-seq libraries were prepared for each ChIP from three independent ChIP experiments  
225 using TruSeq ChIP Sample Preparation Kit (Illumina) or NEBNext Ultra II DNA Library Prep  
226 Kit (New England Biolabs) according to manufacturer's instructions, but with fewer and ChIP-  
227 specific amplification cycles. The libraries were sequenced using the NextSeq 500  
228 instrument (Illumina). The reads were aligned to the relevant custom genomes using Bowtie2  
229 (Langmead and Salzberg, 2012). The genomes used were the *Gallus\_gallus*-4.0 genome,  
230 with the region spanning  $\phi$ V and *IgL* locus (chr15:7,921,694–7,955,323) replaced with  
231 respective reporter construct sequence and the human GRCh38 genome with the lentivirus  
232 reporter appended as an extra chromosome.

233

234 The ChIP signals (rpkm) from the GFP transcription unit of the reporter were compared to the  
235 500 most highly expressed genes longer than 1,500 bp (according to DT40 GRO-seq and  
236 Ramos GRO-seq (Meng et al., 2014)). Chicken and human gene annotations were from  
237 *Gallus\_gallus*-4.0 and GRCh38 genomes, respectively.

238

239 *GRO-seq*

240 The GRO-seq was done as previously described (Core et al., 2008). Nuclei were prepared  
241 from 20 million cells of each line. The reads from libraries were aligned with Bowtie2

242 (Langmead and Salzberg, 2012) to the custom Gallus\_gallus-4.0 genome with the region  
243 spanning  $\varphi V$  and *IgL* locus (chr15:7,921,694–7,955,323) replaced with respective reporter  
244 construct sequence. The alignment was done as previously described (Meng et al., 2014).

245

246 Data availability

247 ChIP-seq and GRO-seq data are available through GEO database (Accession number:

248 GSE180178).

249

250 RESULTS

251

252 **Experimental system for analysis of DIVAC function**

253

254 To investigate the mutation targeting mechanism of DIVACs, we compared GFP-based  
255 genome-integrated transcription units either flanked or not flanked by a strong DIVAC. In  
256 these systems, the DIVACs can stimulate AID-mediated mutation of the transcription unit up  
257 to two orders of magnitude while the production of full-length transcripts and GFP protein are  
258 either unaltered or only slightly increased. Two different reporter systems were used, both of  
259 which utilize a strong viral promoter driving GFP transcription, downstream of which are an  
260 internal ribosome entry site (ires) and a drug selection marker (Bsr). In the first system, the  
261 *GFP2* reporter vector (Figure 1A) is integrated into the chicken DT40 B-cell line by  
262 homologous recombination, with insertion into an "empty" *IgL* locus lacking *IgL* and pseudo V  
263 sequences (Blagodatski et al., 2009). DT40 cells have been used extensively to characterize  
264 *Ig* GCV, SHM, and AID targeting (Arakawa and Buerstedde, 2009; Arakawa et al., 2002;  
265 Blagodatski et al., 2009; Budzyńska et al., 2017; Buerstedde et al., 2014; Chandra et al.,  
266 2015; Kodgire et al., 2013; Kohler et al., 2012; Kothapalli et al., 2008, 2011; McDonald et al.,  
267 2013; Romanello et al., 2016; Tanaka et al., 2010; Williams et al., 2016; Yabuki et al., 2009).  
268 The second system utilizes a retroviral reporter vector and the human Burkitt lymphoma line  
269 Ramos and is described below.

270

271 After integration of *GFP2*, with or without a flanking DIVAC element, into the DT40 *IgL* locus,  
272 single-cell subclones were expanded for about 3 weeks and SHM was measured by the loss  
273 of GFP fluorescence (hereafter, "GFP loss") by flow cytometry. As reported previously  
274 (Blagodatski et al., 2009; Kohler et al., 2012; McDonald et al., 2013), *GFP2* alone ("no  
275 DIVAC") yields extremely low levels of GFP loss (median of 0.034%), and *GFP2* in an intact  
276 *IgL* locus but in AID-deficient DT40 cells (AID<sup>-/-</sup> *IgL*(+) *GFP2*) yielded even lower levels of  
277 GFP loss (0.0038%) (Figure 1B). Several different DIVAC elements were examined (Figure

278 1A). The ~10-kb W DIVAC fragment, which contains all known chicken *IgL* DIVAC function  
279 (Blagodatski et al., 2009), induces SHM activity 200-fold over the no-DIVAC control (Figure 1  
280 B). DIVAC 3-2-1 is a portion of the W fragment, with DIVAC function nearly as strong as that  
281 of W, and consists of three subfragments (1, 2, and 3), of which fragments 2 and 3 contain  
282 the DIVAC activity (Figure 1 A and B; compare 3-2-1 *GFP2* to 1 *GFP2*) (Kohler et al., 2012).  
283 Fragments 2 and 3 were further trimmed to a 1,928-bp DIVAC element that retains most of  
284 the DIVAC activity of the W fragment (Figure 1A and B; 1928 *GFP2*) (Kohler et al., 2012).  
285 Mutation of all 20 E boxes within DIVAC 1928 (CANNTG to AANNTG) reduces its DIVAC  
286 activity 10-fold (Figure 1A and B; 1928*m* *GFP2*) (Kohler et al., 2012; McDonald et al., 2013).  
287 SuperDIVAC1 (SD1) is a composite 2.1-kb DIVAC element composed of the active core of  
288 the W fragment flanked by the human *IgH* intronic enhancer and human *IgL* enhancer core  
289 elements (Williams et al., 2016). SD1 drives GFP loss as efficiently as the entire W fragment  
290 (Figure 1B; *SD1 GFP2*).

291  
292 DIVACs have a modest potential to increase the expression of the neighboring transcription  
293 unit in the context of genome-integrated SHM reporters. The most potent DIVACs (W, SD1,  
294 3-2-1, and 1928) increase GFP expression by 2–2.5-fold, as assessed by GFP mean  
295 fluorescence intensity (MFI) of the GFP-positive population (Figure 1C), which is far less than  
296 the stimulation of GFP loss (Figure 1B). AID has no discernable effect on GFP MFI, since the  
297 W *GFP2* reporter in an AID-deficient cell line had similar GFP MFI in both AID-deficient and  
298 in AID-expressing cells (Figure 1C; compare *W GFP2* to *AID*<sup>-/-</sup> *W GFP2*). In the reporters  
299 described above, the DIVACs are inserted immediately upstream of the *GFP2* transcription  
300 unit and thus might increase GFP expression by providing incremental promoter activity.

301  
302 To test this idea and to attempt to eliminate the stimulatory effect of DIVAC on transcription,  
303 we inserted DIVAC regions 2-3 downstream of *GFP2* (Figure 1A). We also inserted a mouse  
304 Rag1 intron (Ri) sequence immediately upstream of the promoter to provide a unique base-  
305 balanced sequence to facilitate subsequent analyses. The Ri sequence had no effect on

306 GFP loss (Figure 1D, *GFP2* 0.034% vs. *Ri GFP2* 0.041,  $p=0.50$ ) or on levels of full-length  
307 *GFP* transcripts (Figure 1E, *GFP2* 0.80 vs. *Ri GFP2* 0.95,  $p=0.43$ ). Importantly, DIVAC 2-3  
308 did not significantly alter expression from the downstream location, as assessed by GFP MFI  
309 (Figure 1C, 3-2-1 *GFP2* vs. *Ri GFP2* 2-3). Three independent clones of both *Ri GFP2* and *Ri*  
310 *GFP2* 2-3 were analyzed for GFP loss. DIVAC 2-3 increased GFP loss on average 20-fold  
311 relative to the *Ri GFP2* control (Figure 1B, GFP loss *Ri GFP2* 2-3 2.03%,  $p=0.012$ ),  
312 indicating that the DIVAC 2-3 has strong DIVAC activity from both upstream and downstream  
313 locations. Single subclones from *Ri GFP2* cl.1 and *Ri GFP2* 2-3 cl.1 (Figure 1D, red  
314 diamond) that have a non-significant difference GFP MFI (Figure 1C) or GFP mRNA  
315 expression as assessed by RT-qPCR (Figure 1E) were used for subsequent analyses. The  
316 downstream configuration isolates DIVAC activity from effects on steady-state transcription  
317 levels and allows for a well-controlled investigation into the DIVAC targeting mechanism.

318

319

### 320 **DIVACs do not act through increasing H3K27ac**

321

322 As noted above, super-enhancers are sometimes themselves targeted by off-target SHM. To  
323 understand the contribution of the H3K27ac, a histone mark for enhancers, to the targeting of  
324 SHM, we asked whether DIVACs alter levels of H3K27ac in the SHM reporter. ChIP-seq  
325 revealed substantial H3K27ac across the entire *Ri GFP2* reporter (Figure 2A). As expected,  
326 the DIVAC 2-3 region displayed high levels of H3K27ac and was associated with a small but  
327 detectable increase of H3K27ac in the reporter area flanking the DIVAC and the genomic  
328 region downstream of the reporter (Figure 2A, panels i and ii).

329

330 To investigate whether the increase in H3K27ac over the entire reporter was simply caused  
331 by the inserted DIVAC 2-3 element, we extended the analysis to *DIVAC 1928* and *DIVAC*  
332 *1928m*, which differ only by 20 single-bp changes. The H3K27ac pattern and levels in the  
333 two reporters were nearly indistinguishable (Figure 2B), indicating that modulation of

334 H3K27ac is unlikely a critical part of the mechanism by which DIVAC stimulates SHM in  
335 DT40 cells.

336

337 To verify that DIVAC does not act by modulating levels of H3K27ac and that these findings  
338 were not a cell line- or species-specific phenomenon, we tested the effect of DIVAC on  
339 H3K27ac in the human Burkitt lymphoma cell line Ramos. To this end, we used lentivirus-  
340 based reporter for SHM, *GFP7*, in which the GFPnovo2 (Buerstedde et al., 2014) coding  
341 sequence is fused in frame to an upstream hypermutation targeting sequence (HTS) (Figure  
342 3A). The HTS contains a high density of AID hotspots, and its sequence was designed such  
343 that cytidine deamination frequently leads to in-frame stop codons and the loss of green  
344 fluorescence of the reporter-bearing cells. After proviral integration into the genome,  
345 transcription of *GFP7* is driven solely by the internal CMV promoter, because the vector  
346 contains a self-inactivating 3' long terminal repeat (Senigl et al., 2019). In the *GFP7* system,  
347 as with *GFP2* in DT40, GFP loss is strongly stimulated by DIVACs and is caused by AID-  
348 dependent point mutations in the reporter open reading frame (Figure 3A and (Senigl et al.,  
349 2019)). The DIVAC elements used in the *GFP7* system were SD1 and a slightly longer  
350 version, SD2, which differs by addition of the mouse Igλ 3-1 shadow enhancer (Buerstedde  
351 et al., 2014) upstream of the SD1 (fragment “d” in Figure 3A). The lentiviral *GFP7* reporter  
352 with SD1 has a more than 30-fold increased mutation rate compared to the no-DIVAC  
353 control, as measured by GFP fluorescence loss, and a less than 2-fold induction of  
354 transcription (Figure 3B and C). SD2 induces similar or stronger GFP loss (Figure 3B) and a  
355 2-fold increased GFP protein expression level compared to no DIVAC, similar to that seen  
356 with SD1 (Figure 3D).

357

358 ChIP-seq analysis of H3K27ac in Ramos cells harboring either *GFP7* or *SD1 GFP7*  
359 demonstrated that SD1 is associated with H3K27ac, and that the DIVAC induced a modest  
360 increase of H3K27ac in the portion of the vector most proximal to the DIVAC (Figure 3E).

361 This increase of signal (Figure 3E) might reflect a spread of H3K27ac writer activity recruited  
362 by SD1 into its flanking regions.

363

364 Together with H3K27ac and transcription, trimethylation of histone H3 lysine 36  
365 (H3K36me3), a modification associated with bodies of actively transcribed genes with  
366 various transcription-associated roles, has predictive power for AID targeting (Li et al., 2019;  
367 Wang et al., 2014a). H3K36me3 levels at the transcription unit were elevated by DIVAC 2-3,  
368 most prominently downstream of *GFP* (Figure 2A, panels iii and iv), suggesting that DIVAC  
369 can modulate transcription and/or co-transcriptional events. H3.3 is an ssDNA-stabilizing  
370 histone 3 variant that is enriched in AID target genes (Aida et al., 2013; Romanello et al.,  
371 2016). DIVAC 2-3 had no discernable effect on H3.3 levels in the *GFP* open reading frame,  
372 arguing that DIVACs do not function by modulating H3.3 in the SHM-targeted region (Figure  
373 2A, panels v and vi). While these epigenetic features of the associated genomic region might  
374 be needed for SHM, the inherent mutation enhancer activity of the DIVACs does not rely on  
375 the modulation of H3K27ac or H3.3.

376

377

### 378 **Neither antisense nor convergent transcription are required for efficient SHM**

379

380 To assess the effect of DIVAC on antisense transcription at the GFP reporter, we applied  
381 global run-on sequencing (GRO-seq) to subclones of DT40 cells with the *Ri GFP2* and *Ri*  
382 *GFP2 2-3* reporters. This assay measures the location and abundance of elongation-  
383 competent Pol2 (Core et al., 2008). There were no detectable changes in sense transcription  
384 of the *GFP* gene, antisense transcription upstream of the promoter or around the polyA-  
385 signal sequence between the two reporters (Figure 4A). We did not observe any significant  
386 antisense transcription in the region of the reporter where most of the mutations occur  
387 (Figure 4A and see below). Thus, we found no evidence for convergent or antisense  
388 transcription in the areas targeted for SHM.



389

390 We also performed GRO-seq with a *GFP2* reporter without a DIVAC (*GFP2*) and with the W  
391 DIVAC located upstream of the transcription unit (*W GFP2*). Similar to DIVAC 2-3, W DIVAC  
392 did not induce detectable antisense transcription in *GFP*, nor did it detectably increase  
393 elongation-competent Pol2 engaged in sense transcription in *GFP* (Figure 4B). This  
394 strengthens the conclusion that convergent and antisense transcription in the mutation target  
395 region are not required for SHM. We did observe a DIVAC-dependent increase in Pol2 sense  
396 transcription at the end of the transcription unit (Figure 4). This increase is present  
397 regardless of the location of DIVAC upstream or downstream of the transcription unit and is  
398 greater with the stronger W DIVAC (Figure 4B).

399

400 We reasoned that if promoter-upstream antisense transcription recruits exosome and  
401 underlies the targeting of SHM to the IgV region (Pefanis et al., 2014), we should detect  
402 DIVAC-dependent divergent transcription upstream of the promoter of the *GFP2* reporter.  
403 The divergent transcription was clearly visible in both the *Ri GFP2* and *Ri GFP2 2-3*  
404 reporters, but DIVAC did not increase its magnitude (Figure 4A). No meaningful comparison  
405 of upstream divergent transcription between the *GFP2* and *W GFP2* reporters could be  
406 performed due to the different DNA sequence immediately upstream of the promoter (Figure  
407 4B).

408

409 These data indicate that DIVAC does not lead to or consistently increase divergent or  
410 convergent transcription and thus dissociate the production of antisense RNA from the  
411 function of DIVACs. Therefore, induction of antisense transcription at the target gene does  
412 not play a major role in targeting of mutations by immunoglobulin enhancers in this model  
413 system for SHM.

414

415

416 **DIVACs regulate Pol2 progression through the mutating target gene**

417

418 To investigate whether DIVAC induces mutations by modulating Pol2 progression, we  
419 characterized the effect of DIVAC on Spt5 recruitment as well as the phosphorylation status  
420 of the Pol2-CTD by ChIP-seq. Visual comparison of the data for the *Ri GFP2 2-3* and *Ri*  
421 *GFP2* reporters suggested that DIVAC did not strongly influence the association of the Pol2  
422 catalytic subunit RPB1 (Figure 5A, tracks i and ii), Spt5 (tracks iii and iv), S5P-CTD (tracks v  
423 and vi), or S2P-CTD (tracks vii and viii) in the vicinity of the TSS. To examine this  
424 quantitatively, we calculated the ratio of the ChIP signal in the promoter-proximal region  
425 (TSS  $\pm$ 500 bp, Figure 5B) of the *GFP* gene for the *Ri GFP2 2-3* versus the control *Ri GFP2*  
426 cell lines and compared that ratio to a similar ratio calculated for other highly transcribed  
427 genes in the genome, which should not be affected by the presence or absence of DIVAC in  
428 the reporter. We found that this ratio was not increased at the *GFP* gene relative to other  
429 well-expressed genes (see Materials and Methods) for any of the four features assessed by  
430 ChIP-seq (Figure 5C, bars labeled "Prom"). This indicates that DIVAC does not increase  
431 promoter-proximal levels of total RPB1, its phosphorylated forms, or Spt5 in DT40 cells, and  
432 argues that DIVAC does not regulate promoter-proximal pausing.

433

434 The ChIP-seq traces instead indicated DIVAC-dependent increases in all four parameters in  
435 the body of the transcription unit, particularly for S2P-CTD (Figure 5A). Repeating the  
436 quantitative analysis of the ChIP-seq signals as before, but now in gene bodies (defined as  
437 1,000 bp downstream of the TSS to the transcription termination signal, TTS, Figure 5B),  
438 revealed clear DIVAC-dependent 2.6- to 3.5-fold increases of total Pol2, S5P-CTD, and S2P-  
439 CTD in the *GFP2* gene body in comparison to other highly expressed genes in DT40 cells  
440 (Figure 5C, bars labeled "Body"). Despite the visually apparent DIVAC-dependent increase  
441 of Spt5 in the *GFP2* gene body (Figure 5A, tracks iii and iv), the quantitated increase was  
442 less striking than for the other parameters (Figure 5C). These data argue that DIVAC induces  
443 the accumulation of Pol2, S5P-CTD, and S2P-CTD in the gene body in a context in which  
444 there is no increase in the production of RNA transcripts or GFP protein and no increase in

445 the accumulation of elongation-competent Pol2. We note that the region where the DIVAC-  
446 dependent increase in H3K36me3 signal was observed (Figure 2A) is encompassed by the  
447 region with DIVAC-dependent increases in Pol2 and its CTD-phosphorylated forms,  
448 consistent with the possibility of S2P- and S5P-CTD-mediated recruitment of H3K36me3  
449 writer activity in the DIVAC-regulated transcription unit (Figure 5A, tracks v to viii).

450

451 We then tested whether DIVAC has similar effect in avian and human cell lines and in a  
452 different reporter configuration, in particular, moving DIVAC to a position upstream of the  
453 transcription unit. RPB1, Spt5, and S5P-CTD ChIP-seq analyses of Ramos cells transduced  
454 with either the *GFP7* or *SD2 GFP7* reporters revealed increases in these factors in the  
455 transcription unit (Figure 5D). Quantitation of the ChIP-seq signals confirmed strong DIVAC-  
456 dependent increases in RPB1, S5P-CTD, and to a somewhat lesser extent Spt5 in the body  
457 of the *GFP7* transcription unit compared to other highly expressed genes (Figure 5C). These  
458 increases in the gene body were much larger than in the vicinity of the promoter,  
459 recapitulating the observation from DT40 data (Figure 5C). Therefore, DIVAC-induced Pol2  
460 accumulation is not an idiosyncrasy of a particular cell line or configuration of the reporter  
461 system, and the phenomenon is conserved across species.

462

463 Taken together, these findings demonstrate that DIVACs induce Pol2 stalling in the bodies of  
464 SHM target genes and, importantly, that these increases are accompanied by little or no  
465 increase in the production of mature mRNA.

466

467

468 **Single-stranded DNA regions can be increased by a DIVAC but do not predict**  
469 **mutability**

470

471 Some evidence suggests that IgV regions and perhaps also non-Ig targets of AID have  
472 substantial ssDNA character, which is presumed to promote the ability of AID to act on those

473 regions (Parsa et al., 2012; Romanello et al., 2016; Ronai et al., 2007). However, it is unclear  
474 whether ssDNA is sufficient prerequisite for SHM, or whether susceptibility to the action of  
475 AID requires ssDNA in a specific context, in which case many or even most ssDNA regions  
476 might not be efficient targets of AID. The capacity of DIVAC to stall polymerase implies  
477 increased single-strandedness in DIVAC-regulated genes, but the effect of DIVAC on ssDNA  
478 is unknown.

479

480 To assess the contribution of ssDNA patches to the locus-specificity of SHM and to test the  
481 hypothesis that DIVAC increases ssDNA character in SHM target regions, we analyzed the  
482 effect of various DIVACs on the amount of ssDNA in the *GFP* transcription unit using an  
483 established *in situ* bisulfite assay (Ronai et al., 2007). We treated cross-linked nuclei with  
484 bisulfite to sulfonate accessible single-stranded deoxycytidines (ssCs) in the chromatinized  
485 genome, and after deproteinization, identified the bisulfite-converted ssCs in the *GFP2*  
486 transcription unit by sequencing. From the sequencing data, we calculated the frequency of  
487 ssCs (referred to hereafter as ssDNA frequency) and ssDNA patch size (see Material and  
488 Methods). To single out AID-induced mutations, the assay was performed in parallel in AID-  
489 deficient cells (*AID*<sup>-/-</sup> *W GFP2*). *AID*<sup>-/-</sup> *W GFP2* had a similar ssDNA frequency as the AID  
490 expressing cells ( $10 \times 10^{-3}$  and  $9.5 \times 10^{-3}$ , respectively,  $p=0.76$ , Figure 6A), indicating that  
491 AID expression does not bias the assay readout and that DIVAC can increase single-  
492 strandedness in AID-independent manner. As expected, we found no ssDNA patches in a  
493 non-transcribed control gene *keratin 5* (ssDNA frequency  $<1.4 \times 10^{-3}$ , 4,049 bp sequenced).

494

495 The bisulfite sequencing data revealed that ssDNA frequency at the *GFP* coding sequence  
496 was generally higher in the presence of a functional DIVAC than in its absence. Reporters  
497 lacking an active DIVAC had ssDNA frequencies ranging from  $3.2 \times 10^{-3}$  for *GFP2* to  $6.5 \times$   
498  $10^{-3}$  for *Ri GFP2* (Figure 6A). A statistically significant ~3-fold increase in ssDNA frequency  
499 was seen with the DIVACs W ( $9.5 \times 10^{-3}$ ,  $p=0.016$ ) and SD1 ( $12 \times 10^{-3}$ ,  $p=0.0066$ ) compared  
500 to *GFP2* (Figure 6A). The highest ssDNA frequencies were observed with the *3-2-1 GFP2*

501 ( $16 \times 10^{-3}$ ), *SD1 GFP2* and *Ri GFP2 2-3* ( $12 \times 10^{-3}$ ) reporters, representing a significant  
502 increase over *GFP2* in the case of *Ri GFP 2-3* ( $p=0.043$ ) and a 2.8-fold increase in the  
503 upstream position and 1.8-fold increase in the downstream position relative to their  
504 respective control vectors *1 GFP2* ( $5.8 \times 10^{-3}$ ,  $p=0.15$ ) and *Ri GFP2* ( $6.5 \times 10^{-3}$ ,  $p=0.21$ ),  
505 although these differences were not statistically significant due to large variations in the  
506 datasets (Figure 6A). DIVAC 1928 represents the one exception to the correlation of ssDNA  
507 frequency with DIVAC activity. While it induces SHM more than 100-fold over the *GFP2*  
508 control (Figure 1B), the ssDNA frequency in *1928 GFP2* ( $5.0 \times 10^{-3}$ ) is smaller than in some  
509 reporters lacking a DIVAC (e.g., *Ri GFP2* and *1 GFP2*) and is only 1.6-fold greater than in  
510 *GFP2* ( $p=0.19$ ) (Figure 6A). Furthermore, mutation of its E boxes had a minimal effect on  
511 ssDNA frequency (*1928m GFP2*, Figure 6A) while reducing DIVAC activity 11-fold (Figure  
512 1B). Together, these findings indicate that ssDNA frequency at SHM target regions detected  
513 by bisulfite accessibility exhibits a correlation with but does not reliably predict DIVAC  
514 activity. The difficulty in establishing a tighter correlation might stem from the effects of  
515 upstream DIVAC elements on transcription efficiency (as reflected by GFP MFI; Figure 1C)  
516 and limitations in the ability of the bisulfite assay to specifically detect ssDNA regions  
517 relevant to SHM (see below and Discussion).

518

519 Intriguingly, ssDNA patch size was consistently larger for reporters containing a strong  
520 DIVAC element than those without DIVAC function, ranging from 5.5 nt in *GFP2* to 11 nt in  
521 *SD1 GFP2* and *Ri GFP2 2-3* (Figure 6B). *W GFP2* (8.4,  $p=0.016$ ), *3-2-1 GFP2* (9.2,  
522  $p=0.047$ ), and *Ri GFP2 2-3* (11,  $p=0.042$ ) had significantly larger ssDNA patches than the  
523 *GFP2*. However, these differences were not statistically significant when *3-2-1 GFP2* and *Ri*  
524 *GFP2 2-3* were compared to their respective controls *1 GFP2* and *Ri GFP2*.

525

526 The distribution of ssDNA patches across the analyzed sequences reflects the frequency of  
527 ssDNA patches per sequence. The strongest DIVACs induced more patches (*W* and *1928*

528 up to 5 and 3-2-1 up to 7) per sequence than weaker DIVACs or reporters without a DIVAC,  
529 where most sequences did not have any patches (Figure 6C).

530

531 Analysis of the distribution of ssDNA patches along the *GFP2* transcription unit (TSS +15 to  
532 +1,864 bp) in *Ri GFP2* 2-3 revealed that the location of ssDNA patches did not correlate well  
533 with the location of mutations or GC distribution (Figure 6D-G). Apart from a peak  
534 immediately downstream of the TSS, ssDNA patches were fairly evenly distributed along the  
535 *GFP2* transcription unit (Figure 6E) and did not display an obvious strand bias (Figure 6F). A  
536 similar distribution of ssDNA patches was seen with upstream DIVAC in the reporter 3-2-1  
537 *GFP2* (Figure S1). Mutations, however, accumulated largely in the region between TSS +200  
538 and TSS +1,000 bp (Figure 6G), a pattern reminiscent of that observed during SHM of Ig  
539 genes (Odegard and Schatz, 2006). We conclude that the bulk of the single-stranded DNA  
540 detected by the *in-situ* bisulfite assay in the mutating gene is unlikely to be a direct  
541 consequence of SHM-enhancing activity of DIVACs and that SHM is directed to the TSS  
542 +200 to +1,000 bp region via a mechanism that is not dictated by the incidence of ssDNA  
543 alone.

544

545 Together, our data argue that DIVACs mediate their function by stalling the elongating RNA  
546 Pol2 complex within the SHM target gene. This could allow AID that travels with the Pol2  
547 along with its elongation complex DSIF-PAF-SPT6 to take advantage of the availability of  
548 increased ssDNA, stabilized by the stalled Pol2.

549 DISCUSSION

550

551 Pol2 stalling has been linked to CSR through several findings. The polymerase accumulates  
552 when entering GC-rich switch regions (Rajagopal et al., 2009; Wang et al., 2009), whose  
553 GC-bias contributes to a potential to form unusual DNA structures such as R-loops and G-  
554 quadruplexes that might affect polymerase progression (Yeap and Meng, 2019; Yu and  
555 Lieber, 2019). While Pol2 stalling has been suggested to be involved in the targeting of SHM  
556 (Canugovi et al., 2009; Maul et al., 2014; Wang et al., 2014b), the connection has remained  
557 tenuous, largely due to a lack of explanation for how Ig locus-specificity might be achieved.  
558 Our findings show that Ig enhancers increase Pol2 stalling in the SHM target region,  
559 providing a plausible explanation for how they accomplish SHM targeting.

560

561 Transcription is required for SHM, likely for several reasons: 1) transcription is thought to  
562 provide the ssDNA template for AID (Casellas et al., 2016); 2) AID associates with Pol2 and  
563 Pol2-associated factors such as PAF1, Spt5, Spt6, and Cdk9 (Begum et al., 2012; Methot et  
564 al., 2018; Pavri et al., 2010; Willmann et al., 2012); 3) transcription provides RNA that can  
565 stabilize AID association with DNA (Qiao et al., 2017), target AID to the target region either  
566 directly (Zheng et al., 2015) or via RNA processing and splicing factors such as RNA  
567 exosome (Basu et al., 2011) and SRSF1-3 (Kanehiro et al., 2012; Singh et al., 2020) among  
568 others; and 4) transcription might help maintain accessible DNA and appropriate epigenetic  
569 marks. However, neither transcription nor AID association with chromatin predicts mutability  
570 (Feng et al., 2020). Instead, the specificity of SHM for Ig loci appears to be dictated by Ig  
571 enhancers and enhancer-like elements (DIVACs) by an unknown mechanism (Blagodatski et  
572 al., 2009; Buerstedde et al., 2014). In the context of Ig loci, it is likely that DIVACs have two  
573 distinct SHM-promoting functions, as transcriptional enhancers and as mutational enhancers.  
574 While these activities might usually be coupled, they can be physically separated and  
575 perhaps rely on binding of different factors (Buerstedde et al., 2014; Kothapalli et al., 2011).



576 However, almost nothing is known about how DIVACs, as mutation enhancers, might alter  
577 the properties of the target gene.

578

579 To identify features specifically associated with the mutation enhancer activities of DIVAC,  
580 we took advantage of a system in which target gene expression is largely or completely  
581 independent of DIVAC but in which DIVAC can stimulate SHM by two orders of magnitude.  
582 Using this system, we investigated multiple target gene features previously implicated in  
583 SHM targeting.

584

585 We found that several of these features are either not required for robust SHM targeting or  
586 not regulated by the mutation enhancer activity of DIVACs. First, while convergent  
587 transcription appears to explain some off-target activity of AID (Meng et al., 2014), our data  
588 demonstrate that it is not stimulated by DIVAC or required within the target region for  
589 mutations to occur, at least in the context of our SHM reporters. Indeed, our findings  
590 demonstrate that robust SHM can occur in the absence of substantial antisense transcription.  
591 In addition, we find that promoter-upstream antisense transcription is not affected by DIVAC,  
592 suggesting that RNA exosome activity, previously suggested to play a role in AID IgV  
593 targeting and off-targeting (Pefanis and Basu, 2015), is not a major target of regulation by  
594 mutation enhancers. Second, H3K27ac, a marker used to define super-enhancers, is  
595 associated at approximately equal levels with the mutation target region in the presence and  
596 absence of mutation enhancers. DIVAC itself is abundantly marked by H3K27ac, and this  
597 additional H3K27ac in the vicinity of the SHM target region could increase the mutability of  
598 the target region. Notably, a 10-fold reduction of mutation enhancer activity, achieved by  
599 mutating the E boxes in a DIVAC, did not reduce H3K27ac levels. Third, the histone variant  
600 H3.3, which has the potential to stabilize AID-accessible ssDNA regions in the chromatin of  
601 DT40 cells (Romanello et al., 2016), was not strongly induced by DIVACs. Our data do not  
602 address the possibility that H3K27ac, H3.3, or promoter-upstream antisense RNA production  
603 are needed for SHM, as they are present with and without DIVACs, but our findings strongly



604 argue that they are not sufficient to induce SHM, are not the primary mechanism by which  
605 mutation enhancers operate, and, therefore, also not likely to be central to the mechanism  
606 that confers Ig-locus specificity to SHM.

607

608 Our data show that DIVAC increases the presence of Pol2, Spt5, S5P-CTD, and S2P-CTD at  
609 the mutating transcription unit. In striking contrast, the gene product (GFP) and transcription  
610 at the transcription unit (run-on) were not increased, and mature mRNA production was not  
611 or only slightly increased. The lack of increased transcriptional output argues that DIVAC  
612 prevents the progression of some Pol2 within the transcription unit. This could be achieved  
613 by mechanisms that include induced stalling, backtracking, or premature termination of Pol2.

614

615 As DIVAC does not reduce gene output, the apparent reduction in Pol2 progression might be  
616 compensated for by an increase of Pol2 loading, reinitiation, and/or elongation complex  
617 formation. Our data indicate that mutation enhancers support robust S2P-CTD modification  
618 of Pol2, likely by P-TEFb, consistent with substantial pause release, suggesting that the  
619 mechanism by which DIVAC stalls Pol2 is not similar to that of promoter-proximal pausing.  
620 Thus, it is possible that DIVAC impedes Pol2 progression via an external stalling force such  
621 as by DNA topological stress. To release the stalling, Pol2 backtracking could be involved  
622 and the exposed 3' end of RNA subjected to degradation by TFIIS or RNA exosome  
623 complex, leading to ssDNA exposure and subsequent cytidine deamination. Indeed, stalling  
624 of Pol2 by a premature transcription termination signal or excessive positive supercoiling  
625 ahead of the elongating Pol2 can increase the amount of Pol2, AID, and the frequency of  
626 SHM (Kodgire et al., 2013; Maul et al., 2015).

627

628 DIVAC also increased levels of the histone mark H3K36me3 in the transcription unit. Histone  
629 methyltransferase SETD2 selectively binds S5P-S2P dually phosphorylated Pol2 during  
630 transcription elongation (Kizer et al., 2005; Li et al., 2005; Vojnic et al., 2006) and is the only  
631 known writer of H3K36me3 (Edmunds et al., 2008). While our analyses do not assess dually

632 phosphorylated CTD, it is possible that DIVAC often induces S2P and S5P in the same CTD.  
633 H3K36me3 has various important functions including preventing transcription initiation in  
634 gene bodies by, e.g., recruiting histone chaperones such as FACT complex (Carvalho et al.,  
635 2013), facilitating DNA repair (Sun et al., 2020), and regulating RNA splicing (Barash et al.,  
636 2010). Several protein factors mediating these biological processes have been directly or  
637 indirectly implicated in AID recruitment, mutation targeting, or SHM activity (Aida et al., 2013;  
638 Kanehiro et al., 2012; Methot et al., 2018) and might be involved in reinforcing the restriction  
639 of SHM within a DIVAC-containing TAD (Senigl et al., 2019).

640

641 In a striking parallel with DIVAC-mediated regulation of its target gene, SHM-susceptible or  
642 “hot” TADs genome-wide are significantly enriched in Spt5, and S5P-CTD, but not with  
643 increased GRO-seq or H3K4me3 signal when compared to SHM-resistant or “cold” TADs  
644 (Senigl et al., 2019). Furthermore, at least some hot TADs contain elements with DIVAC  
645 activity (Senigl et al., 2019). Combined with these observations, our findings raise the  
646 possibility that on-target and off-target SHM have mechanistic similarities.

647

648 Our findings suggest that DIVAC can increase the single-strandedness of the mutating gene.  
649 The DIVAC-induced patches roughly correspond to the size of the Pol2 transcription bubble  
650 and the size of AID-induced clustered mutations during Pol2 transcription *in vitro* (Parsa et  
651 al., 2012; Pham et al., 2019; Romanello et al., 2016; Ronai et al., 2007). One potentially  
652 confounding variable in our analysis of ssDNA frequency is overall transcription levels. The  
653 strongest DIVACs that induce ssDNA character (W, SD1, and 3-2-1) were positioned  
654 upstream of the transcription unit and increased the expression of the GFP most strongly,  
655 likely due to their proximity to the promoter. Interestingly, the distribution of ssDNA patches  
656 does not resemble the mutation pattern and instead resembles the distribution of Pol2 and  
657 Spt5 in the reporter (Figure S2). Thus, ssDNA patches detected with the *in-situ* bisulfite  
658 method are likely to track Pol2 complexes, including the vast majority that do not lead to AID-  
659 mediated deamination. Consistent with a contribution of transcription to ssDNA frequency,

660 mutation of the E boxes in DIVAC 1928 has little effect on either GFP MFI, transcription  
661 (McDonald et al., 2013), or ssDNA frequency.

662

663 Transcription bubbles created by the Pol2 complex cannot by themselves be what targets  
664 SHM. The bubbles are accessible to nucleotides but not proteins (Barnes et al., 2015), and  
665 the reporter without a DIVAC is robustly transcribed but not mutated, as are many genes in  
666 GC B cells, including Ig constant regions. Even in rearranged IgV regions of GC B cells,  
667 where SHM is occurring efficiently, only approximately one mutation occurs per cell division,  
668 highlighting the fact that very few Pol2 transcription events lead to a mutation (Yeap and  
669 Meng, 2019). Therefore, it is likely that only a small subset of Pol2 complexes in the mutation  
670 target region are competent to recruit AID action and SHM. If indeed only a small fraction of  
671 Pol2 is relevant for SHM, identification of those Pol2 molecules might be difficult.

672

673 Importantly, DIVAC 2-3 in the downstream position (*Ri GFP2 2-3*) does not increase GFP  
674 expression (at either protein or mRNA level) but increases the ssDNA character of the target.  
675 This indicates that in this case, DIVAC-induced ssDNA is not simply a result of increased  
676 transcriptional output. We found that the size of ssDNA patches was consistently increased  
677 in the presence of an active DIVAC. Such an increase could arise in a local region of  
678 negative supercoiling that stabilizes ssDNA, e.g., upstream of clustered, arrested Pol2-  
679 complexes (Wang et al., 2014b). Indeed, bisulfite-accessible ssDNA can arise from DNA  
680 negative supercoiling that facilitates AID access to DNA (Parsa et al., 2012). Together, our  
681 findings suggest that DIVAC can increase the single-strandedness of the mutating gene and  
682 that the induced single-strandedness could be linked to the mutation enhancer activity of  
683 DIVAC.

684

685 In the absence of histone H3.3, ssDNA, SHM, and GCV are reduced in the *IgL V* region of  
686 DT40 cells without affecting transcription kinetics, suggesting that H3.3 can promote or  
687 stabilize ssDNA and thereby facilitate IgV region mutation (Romanello et al., 2016). H3.3 is

688 also associated with many AID off-targets genome-wide (Aida et al., 2013). However, DIVAC  
689 does not have a major effect on levels of H3.3 at the *GFP* gene. Thus, while H3.3 can  
690 facilitate AID-mediated diversification, it is unlikely to be critical for determining the locus-  
691 specific targeting of SHM.

692

693 The catalytic pocket of AID is shielded and AID catalysis is remarkably slow, mediating a  
694 reaction every 1–4 minutes (King et al., 2015; Larijani et al., 2007), and slow catalysis is  
695 potentially an important rate-limiting step for SHM. Longer persistence of AID on DNA with  
696 stalled Pol2 could allow sufficient time for AID to act on ssCs. We cannot rule out the role of  
697 AID recruitment by DIVACs, as AID ChIP signals are not consistently above background  
698 even in the context of a strong DIVAC (data not shown). Given that Pol2-associated Spt5 can  
699 recruit AID to DNA (Maul et al., 2014; Methot et al., 2018; Pavri et al., 2010), even a small  
700 local increase of Spt5 and Pol2 by DIVAC, particularly in the context of stalled Pol2, might  
701 have a significant impact on the efficiency of SHM.

702

703 In summary, our data implicate Pol2 elongation control in the function of DIVACs and the  
704 targeting for SHM and support a model in which Ig enhancers allow more time for AID to act  
705 on ssDNA in the SHM target region, thereby increasing the likelihood of a deamination event.

706 **Competing interests:** The authors declare no competing interests.

707

708 **Acknowledgements:** The work was supported by the Israel Science Foundation grant  
709 1920/20 (Y.M.), Czech Science Foundation grant 15-24776S (F.S.), National Institutes of  
710 Health grants AI 127642 (D.G.S.) and T32 AI 007019 (J.J.M.), grants from the Sigrid Juselius  
711 Foundation, the Jane and Aatos Erkkö Foundation, the Jenny and Antti Wihuri Foundation,  
712 the Ella and Georg Ehrnrooth Foundation, the Cancer Society of South-West Finland and the  
713 Emil Aaltonen Foundation (J.A.), the Turku University Foundation and the Maud Kuistila  
714 Memorial Foundation (J.A. and A.S.), as well as K. Albin Johansson's Foundation (P.M.).  
715

716 REFERENCES

717

- 718 Aida, M., Hamad, N., Stanlie, A., Begum, N.A., and Honjo, T. (2013). Accumulation of the  
719 FACT complex, as well as histone H3.3, serves as a target marker for somatic  
720 hypermutation. *Proc. Natl. Acad. Sci. U. S. A.* *110*, 7784–7789.
- 721 Arakawa, H., and Buerstedde, J.M. (2009). Activation-induced cytidine deaminase-mediated  
722 hypermutation in the DT40 cell line. In *Philosophical Transactions of the Royal*  
723 *Society B: Biological Sciences*, (Royal Society), pp. 639–644.
- 724 Arakawa, H., Hauschild, J., and Buerstedde, J.-M. (2002). Requirement of the Activation-  
725 Induced Deaminase(AID) gene for Immunoglobulin Gene Conversion. *Science* *295*,  
726 1301–1306.
- 727 Barash, Y., Calarco, J.A., Gao, W., Pan, Q., Wang, X., Shai, O., Blencowe, B.J., and Frey,  
728 B.J. (2010). Deciphering the splicing code. *Nature* *465*, 53–59.
- 729 Barnes, C.O., Calero, M., Malik, I., Graham, B.W., Spahr, H., Lin, G., Cohen, A.E., Brown,  
730 I.S., Zhang, Q., Pullara, F., et al. (2015). Crystal Structure of a Transcribing RNA  
731 Polymerase II Complex Reveals a Complete Transcription Bubble. *Mol. Cell* *59*, 258–  
732 269.
- 733 Basu, U., Meng, F.L., Keim, C., Grinstein, V., Pefanis, E., Eccleston, J., Zhang, T., Myers, D.,  
734 Wasserman, C.R., Wesemann, D.R., et al. (2011). The RNA exosome targets the AID  
735 cytidine deaminase to both strands of transcribed duplex DNA substrates. *Cell* *144*,  
736 353–363.
- 737 Begum, N.A., Stanlie, A., Nakata, M., Akiyama, H., and Honjo, T. (2012). The histone  
738 chaperone Spt6 is required for activation-induced cytidine deaminase target  
739 determination through H3K4me3 regulation. *J. Biol. Chem.* *287*, 32415–32429.
- 740 Blagodatski, A., Batrak, V., Schmidl, S., Schoetz, U., Caldwell, R.B., Arakawa, H., and  
741 Buerstedde, J.M. (2009). A cis-acting diversification activator both necessary and  
742 sufficient for AID-mediated hypermutation. *PLoS Genet.* *5*, e1000332.
- 743 Budzyńska, P.M., Kyläniemi, M.K., Kallonen, T., Soikkeli, A.I., Nera, K.-P., Lassila, O., and  
744 Alinikula, J. (2017). Bach2 regulates AID-mediated immunoglobulin gene conversion  
745 and somatic hypermutation in DT40 B cells. *Eur. J. Immunol.* *47*, 993–1001.
- 746 Buerstedde, J.-M.M., Alinikula, J., Arakawa, H., McDonald, J.J., and Schatz, D.G. (2014).  
747 Targeting Of Somatic Hypermutation By immunoglobulin Enhancer And Enhancer-  
748 Like Sequences. *PLoS Biol.* *12*, e1001831.
- 749 Buratowski, S. (2009). Progression through the RNA Polymerase II CTD Cycle. *Mol. Cell* *36*,  
750 541–546.
- 751 Canugovi, C., Samaranyake, M., and Bhagwat, A.S. (2009). Transcriptional pausing and  
752 stalling causes multiple clustered mutations by human activation-induced deaminase.

- 753 FASEB J. 23, 34–44.
- 754 Carvalho, S., Raposo, A.C., Martins, F.B., Grosso, A.R., Sridhara, S.C., Rino, J., Carmo-  
755 Fonseca, M., and De Almeida, S.F. (2013). Histone methyltransferase SETD2  
756 coordinates FACT recruitment with nucleosome dynamics during transcription.  
757 Nucleic Acids Res. 41, 2881–2893.
- 758 Casellas, R., Basu, U., Yewdell, W.T., Chaudhuri, J., Robbiani, D.F., and Di Noia, J.M.  
759 (2016). Mutations, kataegis and translocations in B cells: Understanding AID  
760 promiscuous activity. Nat. Rev. Immunol. 16, 164–176.
- 761 Chandra, V., Bortnick, A., and Murre, C. (2015). AID targeting: Old mysteries and new  
762 challenges. Trends Immunol. 36, 527–535.
- 763 Chaudhuri, J., Tian, M., Khuong, C., Chua, K., Pinaud, E., and Alt, F.W. (2003).  
764 Transcription-targeted DNA deamination by the AID antibody diversification enzyme.  
765 Nature 422, 726–730.
- 766 Cogné, M., Lansford, R., Bottaro, A., Zhang, J., Gorman, J., Young, F., Cheng, H.L., and Alt,  
767 F.W. (1994). A class switch control region at the 3' end of the immunoglobulin heavy  
768 chain locus. Cell 77, 737–747.
- 769 Core, L., and Adelman, K. (2019). Promoter-proximal pausing of RNA polymerase II: A nexus  
770 of gene regulation. Genes Dev. 33, 960–982.
- 771 Core, L.J., Waterfall, J.J., and Lis, J.T. (2008). Nascent RNA sequencing reveals widespread  
772 pausing and divergent initiation at human promoters. Science (80-. ). 322, 1845–  
773 1848.
- 774 Dinesh, R.K., Barnhill, B., Ilanges, A., Wu, L., Michelson, D.A., Senigl, F., Alinikula, J.,  
775 Shabanowitz, J., Hunt, D.F., and Schatz, D.G. (2020). Transcription factor binding at  
776 Ig enhancers is linked to somatic hypermutation targeting. Eur. J. Immunol. 50, 380–  
777 395.
- 778 Edmunds, J.W., Mahadevan, L.C., and Clayton, A.L. (2008). Dynamic histone H3  
779 methylation during gene induction: HYPB/Setd2 mediates all H3K36 trimethylation.  
780 EMBO J. 27, 406–420.
- 781 Feng, Y., Seija, N., Di Noia, J.M., and Martin, A. (2020). AID in Antibody Diversification:  
782 There and Back Again. Trends Immunol. 41, 586–600.
- 783 Hnisz, D., Abraham, B.J., Lee, T.I., Lau, A., Saint-André, V., Sigova, A.A., Hoke, H.A., and  
784 Young, R.A. (2013). Super-enhancers in the control of cell identity and disease. Cell  
785 155, 934.
- 786 Kanehiro, Y., Todo, K., Negishi, M., Fukuoka, J., Gan, W., Hikasa, T., Kaga, Y., Takemoto,  
787 M., Magari, M., Li, X., et al. (2012). Activation-induced cytidine deaminase (AID)-  
788 dependent somatic hypermutation requires a splice isoform of the serine/arginine-rich  
789 (SR) protein SRSF1. Proc. Natl. Acad. Sci. U. S. A. 109, 1216–1221.



- 790 Keim, C., Kazadi, D., Rothschild, G., and Basu, U. (2013). Regulation of AID, the B-cell  
791 genome mutator. *Genes Dev.* 27, 1–17.
- 792 King, J.J., Manuel, C.A., Barrett, C. V., Raber, S., Lucas, H., Sutter, P., and Larijani, M.  
793 (2015). Catalytic pocket inaccessibility of activation-induced cytidine deaminase is a  
794 safeguard against excessive mutagenic activity. *Structure* 23, 615–627.
- 795 Kizer, K.O., Phatnani, H.P., Shibata, Y., Hall, H., Greenleaf, A.L., and Strahl, B.D. (2005). A  
796 Novel Domain in Set2 Mediates RNA Polymerase II Interaction and Couples Histone  
797 H3 K36 Methylation with Transcript Elongation. *Mol. Cell. Biol.* 25, 3305–3316.
- 798 Kodgire, P., Mukkavar, P., Ratnam, S., Martin, T.E., and Storb, U. (2013). Changes in RNA  
799 polymerase II progression influence somatic hypermutation of Ig-related genes by  
800 AID. *J. Exp. Med.* 210, 1481–1492.
- 801 Kohler, K.M., McDonald, J.J., Duke, J.L., Arakawa, H., Tan, S., Kleinstein, S.H., Buerstedde,  
802 J.-M., and Schatz, D.G. (2012). Identification of core DNA elements that target  
803 somatic hypermutation. *J. Immunol.* 189, 5314–5326.
- 804 Kothapalli, N., Norton, D.D., and Fugmann, S.D. (2008). Cutting Edge: A cis -Acting DNA  
805 Element Targets AID-Mediated Sequence Diversification to the Chicken Ig Light  
806 Chain Gene Locus . *J. Immunol.* 180, 2019–2023.
- 807 Kothapalli, N.R., Collura, K.M., Norton, D.D., and Fugmann, S.D. (2011). Separation of  
808 Mutational and Transcriptional Enhancers in Ig Genes. *J. Immunol.* 187, 3247–3255.
- 809 Langmead, B., and Salzberg, S.L. (2012). Fast gapped-read alignment with Bowtie 2. *Nat.*  
810 *Methods* 9, 357–359.
- 811 Larijani, M., Petrov, A.P., Kolenchenko, O., Berru, M., Krylov, S.N., and Martin, A. (2007).  
812 AID Associates with Single-Stranded DNA with High Affinity and a Long Complex  
813 Half-Life in a Sequence-Independent Manner. *Mol. Cell. Biol.* 27, 20–30.
- 814 Li, J., Ahn, J.H., and Wang, G.G. (2019). Understanding histone H3 lysine 36 methylation  
815 and its deregulation in disease. *Cell. Mol. Life Sci.* 76, 2899–2916.
- 816 Li, M., Phatnani, H.P., Guan, Z., Sage, H., Greenleaf, A.L., and Zhou, P. (2005). Solution  
817 structure of the Set2-Rpb1 interacting domain of human Set2 and its interaction with  
818 the hyperphosphorylated C-terminal domain of Rpb1. *Proc. Natl. Acad. Sci. U. S. A.*  
819 *102*, 17636–17641.
- 820 Liu, M., and Schatz, D.G. (2009). Balancing AID and DNA repair during somatic  
821 hypermutation. *Trends Immunol.* 30, 173–181.
- 822 Liu, M., Duke, J.L., Richter, D.J., Vinuesa, C.G., Goodnow, C.C., Kleinstein, S.H., and  
823 Schatz, D.G. (2008). Two levels of protection for the B cell genome during somatic  
824 hypermutation. *Nature* 451, 841–845.
- 825 Martin, O.A., Garot, A., Le Noir, S., Aldigier, J.-C., Cogné, M., Pinaud, E., and Boyer, F.  
826 (2018). Detecting Rare AID-Induced Mutations in B-Lineage Oncogenes from High-



- 827           Throughput Sequencing Data Using the Detection of Minor Variants by Error  
828           Correction Method. *J. Immunol.* *201*, 950–956.
- 829   Matthews, A.J., Husain, S., and Chaudhuri, J. (2014). Binding of AID to DNA Does Not  
830           Correlate with Mutator Activity. *J. Immunol.* *193*, 252–257.
- 831   Maul, R.W., Cao, Z., Venkataraman, L., Giorgetti, C.A., Press, J.L., Denizot, Y., Du, H., Sen,  
832           R., and Gearhart, P.J. (2014). Spt5 accumulation at variable genes distinguishes  
833           somatic hypermutation in germinal center B cells from ex vivo-activated cells. *J Exp*  
834           *Med* *211*, 2297–2306.
- 835   Maul, R.W., Saribasak, H., Cao, Z., and Gearhart, P.J. (2015). Topoisomerase I deficiency  
836           causes RNA polymerase II accumulation and increases AID abundance in  
837           immunoglobulin variable genes. *DNA Repair (Amst)*. *30*, 46–52.
- 838   McDonald, J.J., Alinikula, J., Buerstedde, J.-M., and Schatz, D.G. (2013). A Critical Context-  
839           Dependent Role for E Boxes in the Targeting of Somatic Hypermutation. *J. Immunol.*  
840           *191*, 1556–1566.
- 841   Meng, F.L., Du, Z., Federation, A., Hu, J., Wang, Q., Kieffer-Kwon, K.R., Meyers, R.M.,  
842           Amor, C., Wasserman, C.R., Neuberg, D., et al. (2014). Convergent transcription at  
843           intragenic super-enhancers targets AID-initiated genomic instability. *Cell* *159*, 1538–  
844           1548.
- 845   Methot, S.P., and Di Noia, J.M. (2016). *Molecular Mechanisms of Somatic Hypermutation*  
846           *and Class Switch Recombination* (Elsevier Inc.).
- 847   Methot, S.P., Litzler, L.C., Subramani, P.G., Eranki, A.K., Fi, H., Patenaude, A., Gilmore,  
848           J.C., Santiago, G.E., Bagci, H., Côté, J., et al. (2018). A licensing step links AID to  
849           transcription elongation for mutagenesis in B cells.
- 850   Muramatsu, M., Sankaranand, V.S., Anant, S., Sugai, M., Kinoshita, K., Davidson, N.O., and  
851           Honjo, T. (1999). Specific expression of activation-induced cytidine deaminase (AID),  
852           a novel member of the RNA-editing deaminase family in germinal center B cells. *J.*  
853           *Biol. Chem.* *274*, 18470–18476.
- 854   Muramatsu, M., Kinoshita, K., Fagarasan, S., Yamada, S., Shinkai, Y., and Honjo, T. (2000).  
855           Class switch recombination and hypermutation require activation-induced cytidine  
856           deaminase (AID), a potential RNA editing enzyme. *Cell* *102*, 553–563.
- 857   Odegard, V.H., and Schatz, D.G. (2006). Targeting of somatic hypermutation. *Nat. Rev.*  
858           *Immunol.* *6*, 573–583.
- 859   Parsa, J.Y., Ramachandran, S., Zaheen, A., Nepal, R.M., Kapelnikov, A., Belcheva, A.,  
860           Berru, M., Ronai, D., and Martin, A. (2012). Negative supercoiling creates single-  
861           stranded patches of DNA that are substrates for AID-mediated mutagenesis. *PLoS*  
862           *Genet.* *8*, e1002518.
- 863   Pavri, R., Gazumyan, A., Jankovic, M., Di Virgilio, M., Klein, I., Ansarah-Sobrinho, C., Resch,

- 864 W., Yamane, A., San-Martin, B.R., Barreto, V., et al. (2010). Activation-induced  
865 cytidine deaminase targets DNA at sites of RNA polymerase II stalling by interaction  
866 with Spt5. *Cell* 143, 122–133.
- 867 Pefanis, E., and Basu, U. (2015). RNA exosome regulates AID DNA mutator activity in the B  
868 cell genome. *Adv. Immunol.* 127, 257–308.
- 869 Pefanis, E., Wang, J., Rothschild, G., Lim, J., Chao, J., Rabadan, R., Economides, A.N., and  
870 Basu, U. (2014). Noncoding RNA transcription targets AID to divergently transcribed  
871 loci in B cells. *Nature* 514, 389–393.
- 872 Pham, P., Malik, S., Mak, C., Calabrese, P.C., Roeder, R.G., and Goodman, M.F. (2019).  
873 AID-RNA polymerase II transcription-dependent deamination of IgV DNA. *Nucleic  
874 Acids Res.* 47, 10815–10829.
- 875 Qian, J., Wang, Q., Dose, M., Pruett, N., Kieffer-Kwon, K.R., Resch, W., Liang, G., Tang, Z.,  
876 Mathé, E., Benner, C., et al. (2014). B cell super-enhancers and regulatory clusters  
877 recruit AID tumorigenic activity. *Cell* 159, 1524–1537.
- 878 Qiao, Q., Wang, L., Meng, F.L., Hwang, J.K., Alt, F.W., and Wu, H. (2017). AID Recognizes  
879 Structured DNA for Class Switch Recombination. *Mol. Cell* 67, 361-373.e4.
- 880 Rajagopal, D., Maul, R.W., Ghosh, A., Chakraborty, T., Khamlichi, A.A., Sen, R., and  
881 Gearhart, P.J. (2009). Immunoglobulin switch  $\square$  sequence causes RNA polymerase II  
882 accumulation and reduces dA hypermutation. 206.
- 883 Revy, P., Muto, T., Levy, Y., Geissmann, F., Plebani, A., Sanal, O., Catalan, N., Forveille, M.,  
884 Dufourcq-Lagelouse, R., Gennery, A., et al. (2000). Activation-induced cytidine  
885 deaminase (AID) deficiency causes the autosomal recessive form of the hyper-IgM  
886 syndrome (HIGM2). *Cell* 102, 565–575.
- 887 Robbiani, D.F., and Nussenzweig, M.C. (2013). Chromosome translocation, B cell  
888 lymphoma, and activation-induced cytidine deaminase. *Annu Rev Pathol* 8, 79–103.
- 889 Romanello, M., Schiavone, D., Frey, A., and Sale, J.E. (2016). Histone H3.3 promotes IgV  
890 gene diversification by enhancing formation of AID-accessible single-stranded DNA.  
891 *EMBO J.* 2, 1–13.
- 892 Ronai, D., Iglesias-Ussel, M.D., Fan, M., Li, Z., Martin, A., and Scharff, M.D. (2007).  
893 Detection of chromatin-associated single-stranded DNA in regions targeted for  
894 somatic hypermutation. *J. Exp. Med.* 204, 181–190.
- 895 Rouaud, P., Vincent-fabert, C., Saintamand, A., Fiancette, R., Marquet, M., Robert, I., Reina-  
896 san-martin, B., Pinaud, E., Cogné, M., and Denizot, Y. (2013). The IgH 3  $\square$  regulatory  
897 region controls somatic hypermutation in germinal center B cells. 210, 1501–1508.
- 898 Saintamand, A., Vincent-Fabert, C., Garot, A., Rouaud, P., Oruc, Z., Magnone, V., Cogné,  
899 M., and Denizot, Y. (2016). Deciphering the importance of the palindromic  
900 architecture of the immunoglobulin heavy-chain 3' regulatory region. *Nat. Commun.* 7.

- 901 Senigl, F., Maman, Y., Dinesh, R.K., Alinikula, J., Seth, R.B., Pecnova, L., Omer, A.D., Rao,  
902 S.S.P., Weisz, D., Buerstedde, J.M., et al. (2019). Topologically Associated Domains  
903 Delineate Susceptibility to Somatic Hypermutation. *Cell Rep.* 29, 3902-3915.e8.
- 904 Singh, A.K., Tamrakar, A., Jaiswal, A., Kanayama, N., and Kodgire, P. (2020). SRSF1-3, a  
905 splicing and somatic hypermutation regulator, controls transcription of IgV genes via  
906 chromatin regulators SATB2, UBN1 and histone variant H3.3. *Mol. Immunol.* 119, 69–  
907 82.
- 908 Sun, Z., Zhang, Y., Jia, J., Fang, Y., Tang, Y., Wu, H., and Fang, D. (2020). H3K36me3,  
909 message from chromatin to DNA damage repair. *Cell Biosci.* 10, 1–9.
- 910 Tanaka, A., Shen, H.M., Ratnam, S., Kodgire, P., and Storb, U. (2010). Attracting AID to  
911 targets of somatic hypermutation. *J Exp Med* 207, 405–415.
- 912 Vincent-Fabert, C., Fiancette, R., Pinaud, E., Truffinet, V., Cogné, N., Cogné, M., and  
913 Denizot, Y. (2010). Genomic deletion of the whole IgH 3' regulatory region (hs3a,  
914 hs1,2, hs3b, and hs4) dramatically affects class switch recombination and Ig  
915 secretion to all isotypes. *Blood* 116, 1895–1898.
- 916 Vojnic, E., Simon, B., Strahl, B.D., Sattler, M., and Cramer, P. (2006). Structure and  
917 carboxyl-terminal domain (CTD) binding of the Set2 SRI domain that couples histone  
918 H3 Lys36 methylation to transcription. *J. Biol. Chem.* 281, 13–15.
- 919 Wang, L., Wuerffel, R., Feldman, S., Khamlichi, A.A., and Kenter, A.L. (2009). S region  
920 sequence, RNA polymerase II, and histone modifications create chromatin  
921 accessibility during class switch recombination. *J. Exp. Med.* 206, 1817–1830.
- 922 Wang, Q., Oliveira, T., Jankovic, M., Silva, I.T., Hakim, O., Yao, K., Gazumyan, A., Mayer,  
923 C.T., Pavri, R., Casellas, R., et al. (2014a). Epigenetic targeting of activation-induced  
924 cytidine deaminase. *Proc. Natl. Acad. Sci. U. S. A.* 111, 18667–18672.
- 925 Wang, X., Fan, M., Kalis, S., Wei, L., and Scharff, M.D. (2014b). A source of the single-  
926 stranded DNA substrate for activation-induced deaminase during somatic  
927 hypermutation. *Nat. Commun.* 5.
- 928 Whyte, W.A., Orlando, D.A., Hnisz, D., Abraham, B.J., Lin, C.Y., Kagey, M.H., Rahl, P.B.,  
929 Lee, T.I., and Young, R.A. (2013). Master transcription factors and mediator establish  
930 super-enhancers at key cell identity genes. *Cell* 153, 307–319.
- 931 Williams, A.M., Maman, Y., Alinikula, J., and Schatz, D.G. (2016). Bcl6 is required for  
932 somatic hypermutation and gene conversion in chicken DT40 cells. *PLoS One* 11,  
933 e0149146.
- 934 Willmann, K.L., Milosevic, S., Pauklin, S., Schmitz, K.M., Rangan, G., Simon, M.T., Maslen,  
935 S., Skehel, M., Robert, I., Heyer, V., et al. (2012). A role for the RNA pol II-associated  
936 PAF complex in AID-induced immune diversification. *J. Exp. Med.* 209, 2099–2111.
- 937 Xu, Z., Zan, H., Pone, E.J., Mai, T., and Casali, P. (2012). Immunoglobulin class-switch DNA

- 938 recombination: Induction, targeting and beyond. *Nat. Rev. Immunol.* *12*, 517–531.
- 939 Yabuki, M., Ordinario, E.C., Cummings, W.J., Fujii, M.M., and Maizels, N. (2009). E2A Acts  
940 in cis in G 1 Phase of Cell Cycle to Promote Ig Gene Diversification . *J. Immunol.*  
941 *182*, 408–415.
- 942 Yamane, A., Resch, W., Kuo, N., Kuchen, S., Li, Z., Sun, H.W., Robbiani, D.F., McBride, K.,  
943 Nussenzweig, M.C., and Casellas, R. (2011). Deep-sequencing identification of the  
944 genomic targets of the cytidine deaminase AID and its cofactor RPA in B  
945 lymphocytes. *Nat. Immunol.* *12*, 62–69.
- 946 Yeap, L.S., and Meng, F.L. (2019). Cis- and trans-factors affecting AID targeting and  
947 mutagenic outcomes in antibody diversification. *Adv. Immunol.* *141*, 51–103.
- 948 Yu, K., and Lieber, M.R. (2019). Current insights into the mechanism of mammalian  
949 immunoglobulin class switch recombination. *Crit. Rev. Biochem. Mol. Biol.* *54*, 333–  
950 351.
- 951 Zhang, X., Zhang, Y., Ba, Z., Kyritsis, N., Casellas, R., and Alt, F.W. (2019). Fundamental  
952 roles of chromatin loop extrusion in antibody class switching. *Nature* *575*, 385–389.
- 953 Zheng, S., Vuong, B.Q., Vaidyanathan, B., Lin, J.Y., Huang, F.T., and Chaudhuri, J. (2015).  
954 Non-coding RNA Generated following Lariat Debranching Mediates Targeting of AID  
955 to DNA. *Cell* *161*, 762–773.
- 956

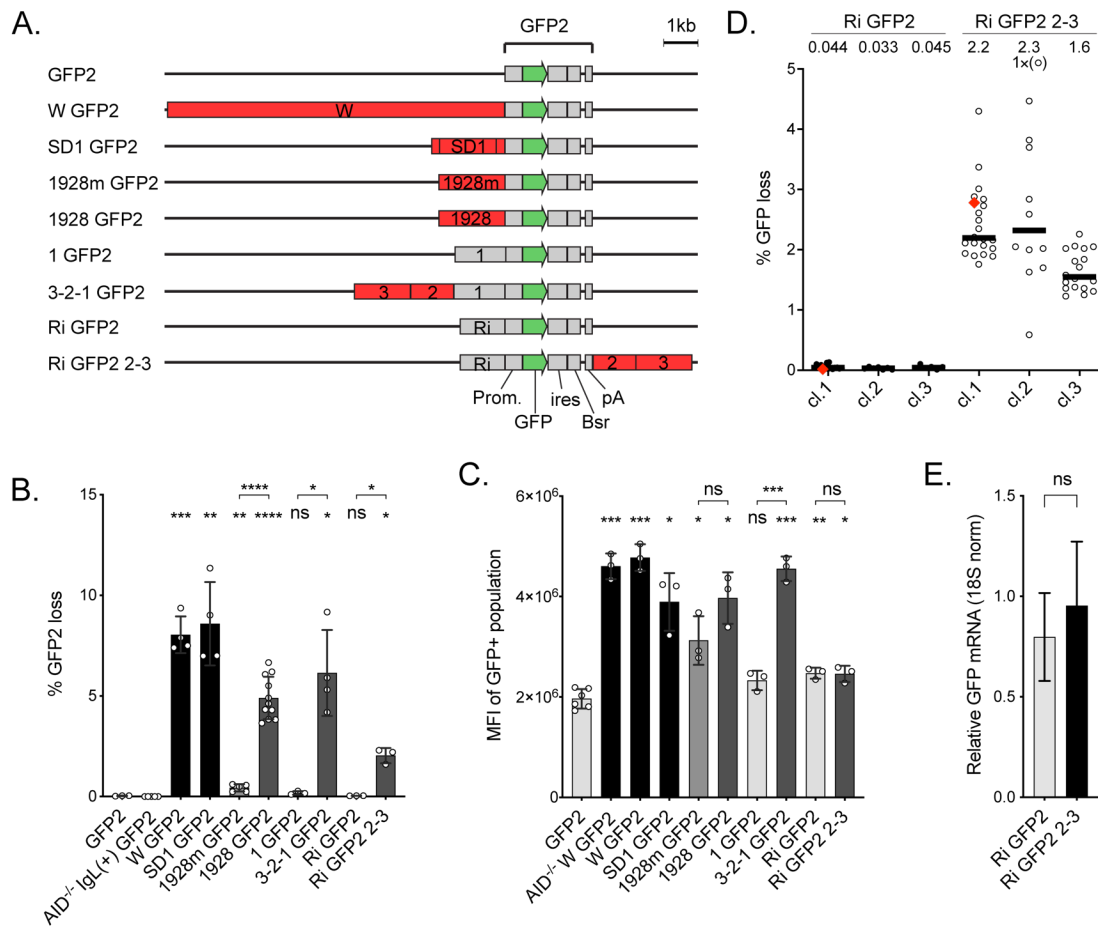

**Figure 1.** Properties of the SHM reporters used in DT40 cells

**A.** Outline of the *GFP2* reporters used in DT40 cells. The reporters differ in the strength (see B) and position of the DIVACs (red) relative to the *GFP* gene (green). The other elements of the reporters are drawn in gray. DIVAC 3-2-1 is a 4.38 kb region of DIVAC W (Blagodatski *et al.*, 2009) derived from the chicken *IgL* locus enhancer region and contains subregions 1, 2, and 3 (Kohler *et al.*, 2012). DIVAC 2-3 is a 2.99-kb region that lacks subregion 1. DIVAC 1928 is a 1928 bp subregion of 2-3 that was trimmed from the ends and has an internal truncation (Kohler *et al.*, 2012). 1928m is E box mutant derivative of 1928 fragment (McDonald *et al.*, 2013). Ri is the intronic sequence from the mouse *Rag1* gene.

**B.** DIVAC activity (% GFP loss) of the reporters outlined in A. Subregion 1 and Ri do not have DIVAC activity. GFP loss in AID-deficient cell line without a DIVAC or *IgL* deletion is shown as a control (Kohler *et al.*, 2012). The bars are shaded to reflect the activities of DIVACs: below 0.2% light gray, 0.2-1% medium gray, 1–6% dark gray, >6% black. Asterisks indicate statistical significance according to Welch's t-test compared to *GFP2* and relative negative controls as indicated. \*  $p < 0.05$ , \*\*  $p < 0.01$ , \*\*\*  $p < 0.001$ , \*\*\*\*  $p < 0.0001$ , ns not significant.

**C.** GFP expression in cell lines with targeted integration of the reporters as measured by mean fluorescence intensity (MFI) of GFP-positive cell population. AID-deficiency does not affect the expression of GFP in *W GFP2* reporter (AID<sup>-/-</sup> *W GFP2*). Asterisks indicate statistical significance according to Welch's t-test compared to *GFP2* and relevant negative controls as indicated. \*  $p < 0.05$ , \*\*  $p < 0.01$ , \*\*\*  $p < 0.001$ , ns not significant. The shading of the bars is as in B.

**D.** GFP loss in three independent clones of DT40 cells with *Ri GFP2* or *Ri GFP2 2-3*, where DIVAC 2-3 is downstream of the *GFP2* cassette. The median percentage of GFP-negative cells after the 14-day assay

period of subclones is indicated. One subclone from Ri GFP2 clone 1 and Ri GFP2 2-3 clone 1 each (red diamonds) are used for C, E, and subsequent analyses. Data point outside the y-axis range is in parenthesis.

**E.** Expression of GFP mRNA from integrated *Ri GFP2* and *Ri GFP2 2-3* reporters using RT-qPCR. The GFP expression is normalized to 18S RNA. The difference is not significant according to Student's t-test.

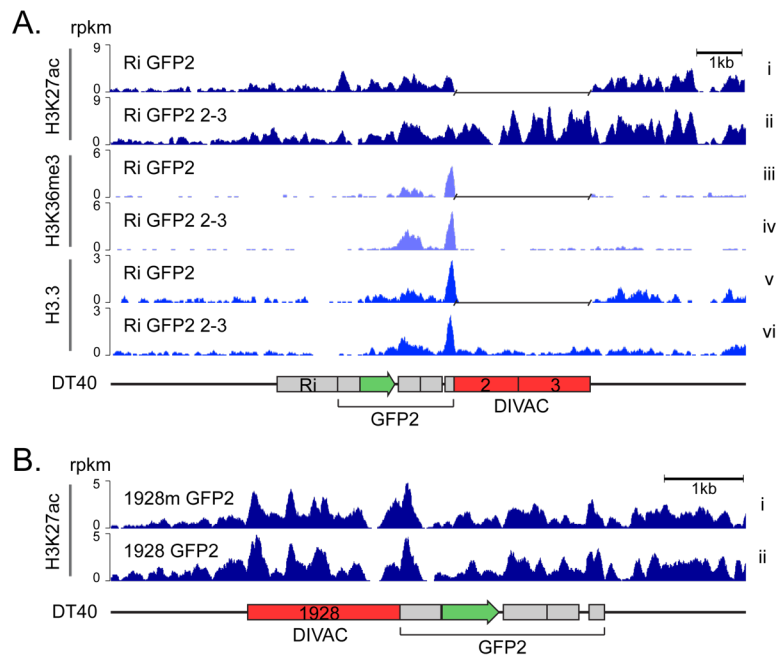

**Figure 2.** Effect of DIVAC on histone marks in DT40 cells

**A.** H3K27ac, H3K36me3 and H3.3 ChIP-seq tracks of genome-integrated *Ri GFP2* (upper tracks) and *Ri GFP2 2-3* (lower tracks) reporters in  $IgL^{-(-)}$  DT40 cells. A gap has been inserted in the tracks of *Ri GFP2* reporter in the place of the DIVAC 2-3 sequence after the alignment. Values are reads per kilobase per million reads (rpkM).

**B.** H3K27ac ChIP-seq of *1928 GFP2* and E-box mutant *1928m GFP2* reporter as in A.

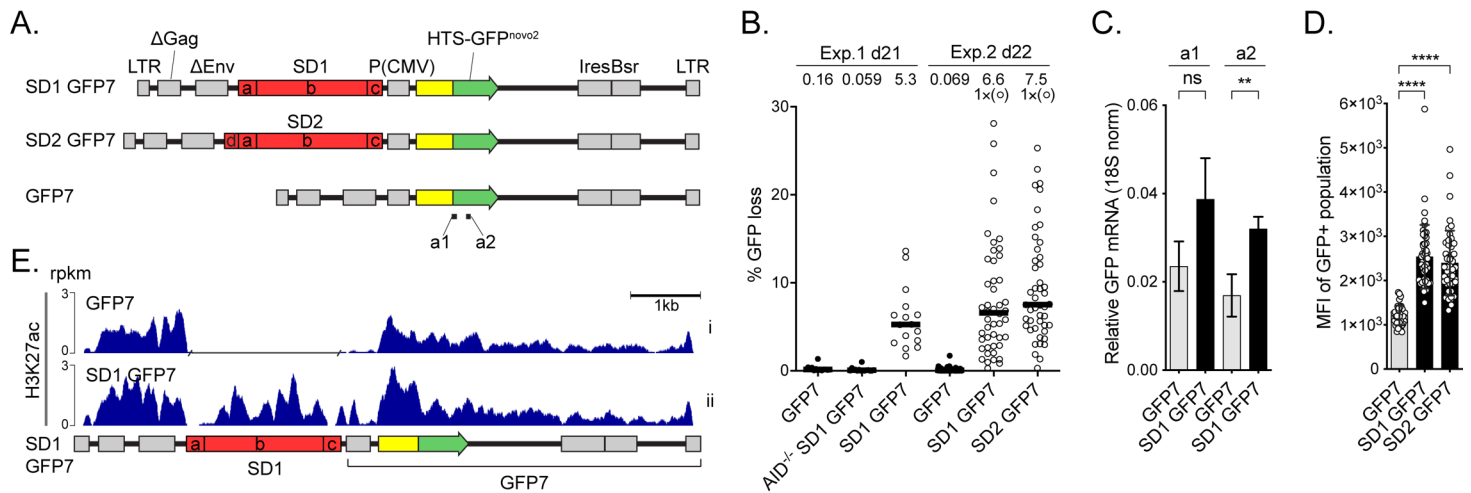

**Figure 3.** The effect of DIVAC on the H3K27ac in Ramos cells

**A.** Outline of the lentiviral *GFP7* reporter used in Ramos cells with SuperDIVAC1 (*SD1 GFP7*), SuperDIVAC2 (*SD2 GFP7*), or without a DIVAC (*GFP7*) inserted upstream of the transcription unit. Locations of amplicons a1 and a2 for RT-qPCR (see C) are indicated.

**B.** GFP loss of the *GFP7* reporters in two independent experiments after 21 and 22 days. *SD1 GFP7* was also assayed in AID-deficient Ramos cells (AID<sup>-/-</sup> *SD1 GFP7*). Data points outside the y-axis range are in parentheses. Values are medians.

**C.** Expression of GFP mRNA from integrated *SD1 GFP7* reporter assessed using two different RT-qPCR amplicons (a1 and a2) indicated in A. Values are mean ± SD. Student's t-test \* p<0.05, \*\* p<0.01, \*\*\* p<0.001, \*\*\*\* p<0.0001, ns not significant.

**D.** Mean fluorescence intensity (MFI) of GFP-positive populations of the reporters in Ramos cells.

**E.** H3K27ac ChIP-seq of the lentiviral *GFP7* reporter with SD1 (*SD1 GFP7*) and without a DIVAC element (*GFP7*) in Ramos cells. A gap has been inserted in the track of *GFP7* reporter in the place of the SD1 sequence after the alignment. Values are rpkm.



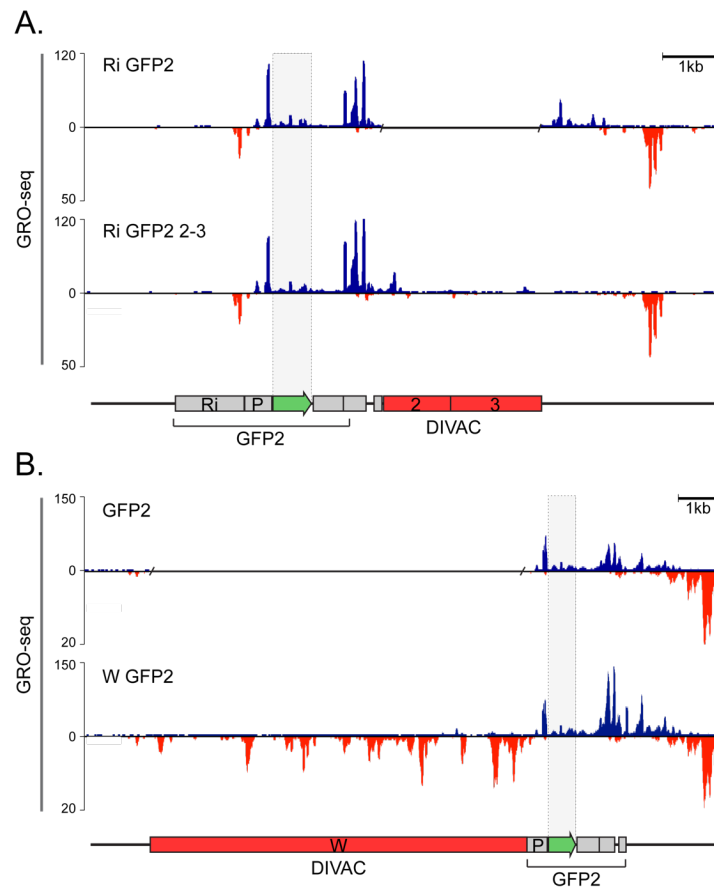

**Figure 4.** DIVACs have no effect on antisense transcription

**A.** GRO-seq analysis of the genome-integrated *Ri GFP2* (upper panel) and *Ri GFP2 2-3* reporters (lower panel).

**B.** GRO-seq analysis of the *GFP2* (upper panel) and *W GFP2* (lower panel) reporters. The upper track of each panel represents the sense transcription (blue) and the lower panel the antisense transcription (red). Note the differences in the scale. A gap has been inserted in the tracks of reporters that do not have a DIVAC. The region of *GFP* coding sequence has been highlighted with shading. The y axes indicate the GRO-seq counts normalized to number of reads per million.

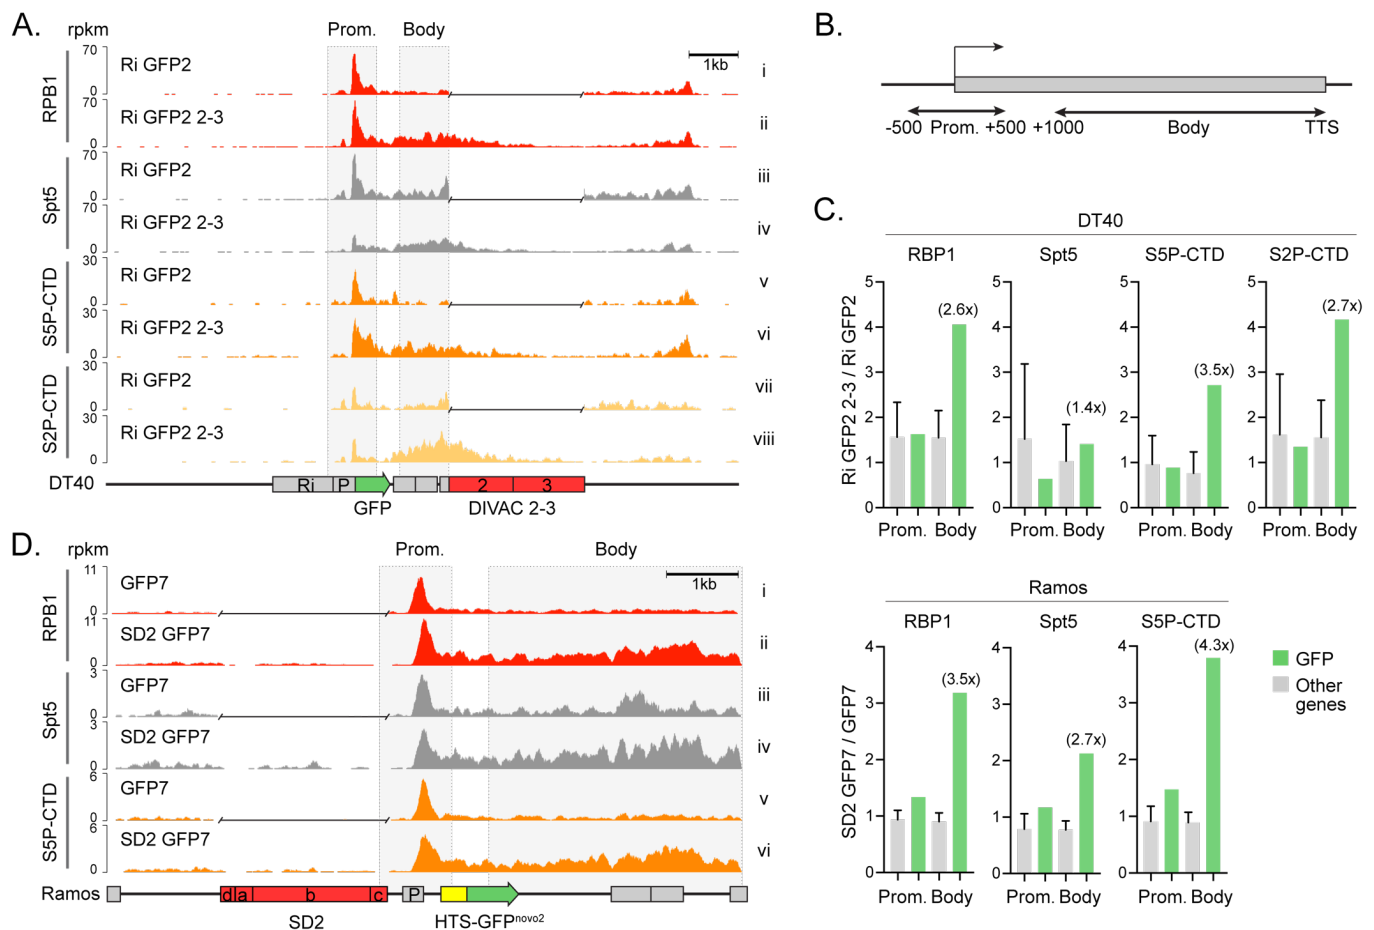

**Figure 5.** DIVACs induce polymerase stalling

**A.** ChIP-seq analysis of the RPB1, Spt5, S5P-CTD, and S2P-CTD of the genome-integrated *Ri GFP2* (upper tracks) and *Ri GFP2 2-3* (lower tracks) reporters and their surrounding region in DT40 cells as indicated.

**B.** The regions for the promoters (TSS +/-500 bp) and the bodies (TSS +1,000 bp to TTS) of genes analyzed in C.

**C.** Ratios of ChIP-seq signal (rpkm) in DT40 and Ramos cells with and without a DIVAC in the regions indicated in B. The ratios at the *GFP* transcription unit (green bars) were compared to the ratios of 500 most highly expressed genes (other genes, gray bars). The fold change at the *GFP* compared to other genes in the gene body is indicated in parentheses. The data are mean + SD.

**D.** ChIP-seq analysis of the RPB1, Spt5, and S5P-CTD of the *GFP7* (upper tracks, no DIVAC) and *SD2 GFP2* (lower tracks) reporters in the Ramos cells as indicated. A gap has been inserted in the tracks of reporters without a DIVAC after the alignment.

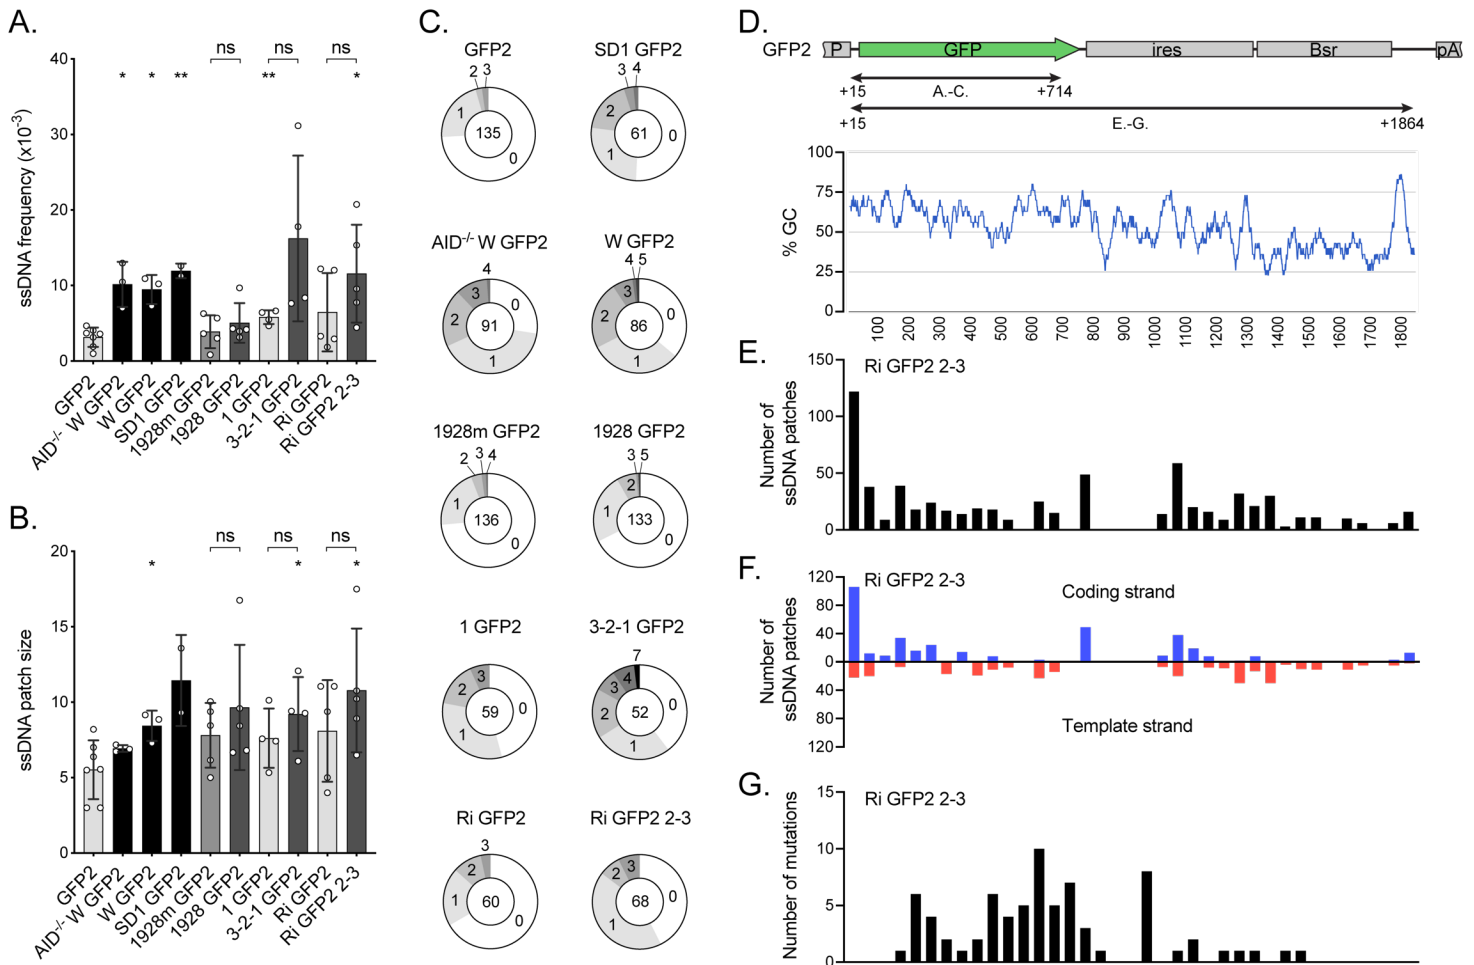

**Figure 6.** The effect of DIVACs on ssDNA

**A.** The frequency of ssDNA in the reporters assayed by *in situ* bisulfite assay (ratio of modified ssCs in patches to all the sequenced Cs) in the region TSS +15 bp to TSS +714 bp as indicated in D. To be counted as a single-stranded patch, a minimum of 2 consecutive C-to-T or G-to-A mutations were required. The asterisks indicate statistical significance according to Welch's t-test when compared to *GFP2*. Lack of significance of additional comparisons are indicated. \*  $p < 0.05$ , \*\*  $p < 0.01$ , ns not significant. The shading of the bars is as in Figure 1B.

**B.** The size of ssDNA patches (mean of minimum and maximum possible patch size) in the same region of the reporters as in A. The asterisks indicate statistical significance according to Welch's t-test when compared to *GFP2*. Lack of significance of additional comparisons are indicated. \*  $p < 0.05$ , ns not significant. The shading of the bars is as in Figure 1B.

**C.** Distribution of ssDNA patches detected per sequence in the same region of the reporters as in A. The numbers indicate the numbers of patches per sequence and the number in the middle indicates the total number of analyzed sequences.

**D.** The location (upper panel) and GC content (bottom panel) of the regions along the *GFP2* transcription unit in which the ssDNA and mutations were analyzed in A-C as well as in E-G. The GC content is plotted with a 30-bp window.

- E.** Location of ssDNA patches (center) in *Ri GFP2 2-3* reporter transcription unit (TSS +15 bp to TSS +1,864 bp). The location of ssDNA patches is plotted in bins of 50 bp.
- F.** The location of ssDNA patches on the coding strand (blue, above the x-axis) and template strand (red, below the x-axis) of the *Ri GFP2 2-3* reporter. The locations are plotted in bins of 50 bp.
- G.** The number of mutations located along the *Ri GFP2 2-3* reporter are plotted in bins of 50 bp. The graphs in E-G align with D.

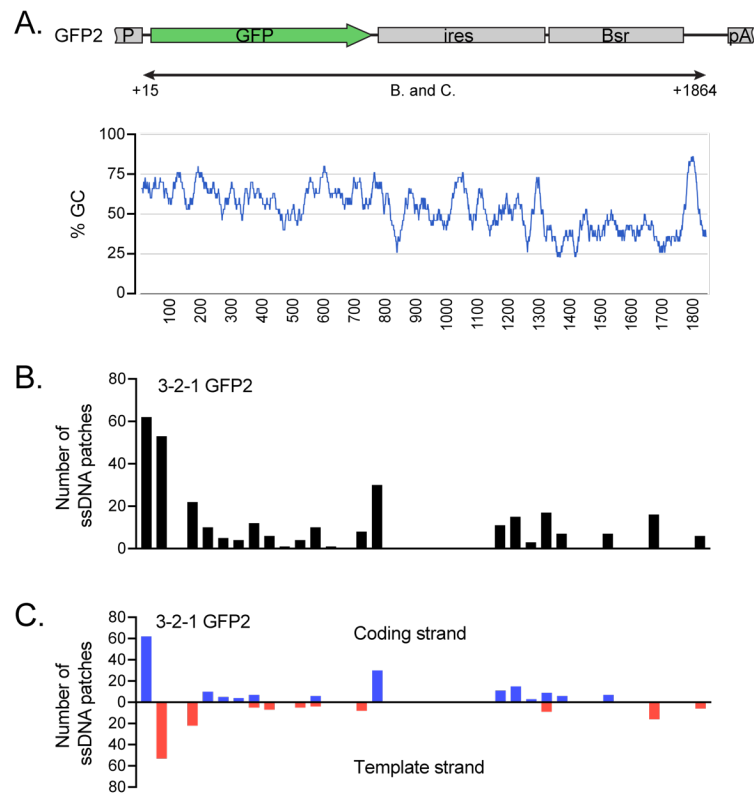

**Figure S1.** The effect of 3-2-1 DIVAC on ssDNA patch location

**A.** The location (upper panel) and GC content (bottom panel) of the region along the *GFP2* transcription unit in which the ssDNA was analyzed for B and C. The GC content is plotted with a 30 bp window.

**B.** Location of ssDNA patch centers in 3-2-1 *GFP2* reporter plotted in bins of 50 bp.

**G.** The location of ssDNA patches on the coding strand (blue, above the x-axis) and template strand (red, below the x-axis) of the 3-2-1 *GFP2* reporter. The locations are plotted in bins of 50 bp.

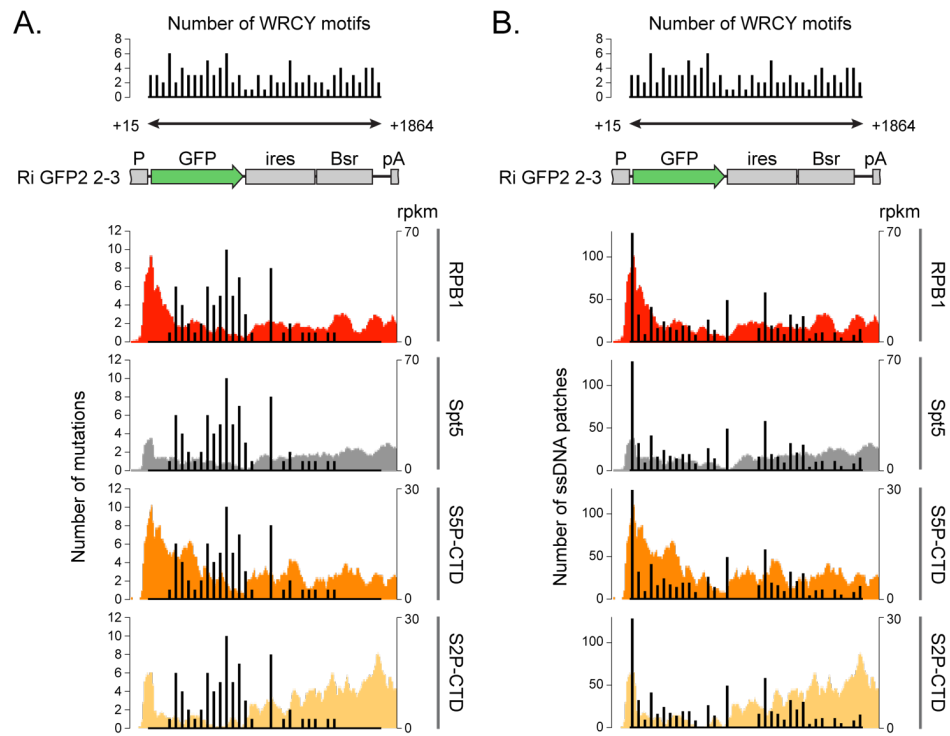

**Figure S2.** Colocalization of Pol2, mutations and ssDNA patches

Comparison of the ChIP-seq signal (from Figure 5A, left y axes) with the location of AID-induced mutations (A) and the location of ssDNA patches (B) at the *Ri GFP2 2-3* reporter plotted in bins of 50 bp (y axes). The location of AID hotspot motifs WRCY/RGYW along the sequenced region (TSS +15 bp to +1,864 bp) is shown at the top.
